# Supplementary material for: Compartmentalized metabolic network reconstruction of microbial communities to determine the effect of agricultural intervention on soils
Source: PLoS One. 2017 Aug 2;12(8):e0181826. doi: 10.1371/journal.pone.0181826 (PMC5540551; doi:10.1371/journal.pone.0181826)
Supplement: S2 Table — (XLSX) [file pone.0181826.s002.xlsx]

## Sheet: Sheet1
S2
Kegg_ID	#MNX_ID	Ecs
R00004	MNXR4373	3.6.1.1
R00005	MNXR681	3.5.1.54
R00006	MNXR392	2.2.1.6
R00008	MNXR7097	4.1.3.17
R00009	MNXR1045	1.11.1.21;1.11.1.6
R00010	MNXR5123	3.2.1.28
R00013	MNXR2736	4.1.1.47
R00018	MNXR3050	2.5.1.44
R00021	MNXR70858	1.4.7.1
R00022	MNXR5635	3.2.1.52
R00024	MNXR4589	4.1.1.39
R00025	MNXR71234	1.13.12.16;1.7.3.1
R00026	MNXR14507	3.2.1.21
R00028	MNXR14508	3.2.1.20
R00029	MNXR70889	1.8.2.2
R00031	MNXR55970	1.10.3.1;1.14.18.1
R00036	MNXR4380	4.2.1.24
R00045	MNXR5173	1.10.3;1.10.3.1;1.14.18.1
R00063	MNXR7739	2.3.1.103
R00066	MNXR69846	2.5.1.9
R00078	MNXR2250	1.16.3.1
R00081	MNXR68605	1.7.2.1;1.9.3.1
R00082	MNXR14523	1.7.2.1;1.9.3.1
R00084	MNXR2980	2.5.1.61;4.2.1.24;4.3.1.8
R00086	MNXR892	3.6.1.15;3.6.1.3;3.6.1.5;3.6.1.8;3.6.3.1;3.6.3.10;3.6.3.11;3.6.3.12;3.6.3.14;3.6.3.15;3.6.3.16;3.6.3.17;3.6.3.18;3.6.3.19;3.6.3.2;3.6.3.20;3.6.3.21;3.6.3.22;3.6.3.23;3.6.3.24;3.6.3.25;3.6.3.26;3.6.3.27;3.6.3.28;3.6.3.29;3.6.3.3;3.6.3.30;3.6.3.31;3.6.3.32;3.6.3.33;3.6.3.34;3.6.3.35;3.6.3.36;3.6.3.37;3.6.3.38;3.6.3.39;3.6.3.4;3.6.3.40;3.6.3.41;3.6.3.42;3.6.3.43;3.6.3.44;3.6.3.46;3.6.3.47;3.6.3.48;3…
R00087	MNXR3901	3.6.1.8
R00089	MNXR485	4.6.1.1
R00093	MNXR31608	1.4.1.14
R00095	MNXR70868	1.6.5.4
R00097	MNXR68478	1.16.1.3
R00103	MNXR3745	3.6.1.22;3.6.1.9
R00104	MNXR3759	2.7.1.23
R00106	MNXR14530	1.6.2.4
R00112	MNXR3771	1.6.1.1;1.6.1.2
R00114	MNXR31609	1.4.1.13
R00115	MNXR2826	1.6.4.2;1.8.1.7
R00124	MNXR883	2.4.2.12;2.7.4.6;3.6.4.10
R00127	MNXR479	2.7.4.3
R00130	MNXR1772	2.7.1.24
R00131	MNXR5297	3.5.1.5
R00132	MNXR2856	1.6.5.4;4.2.1.1
R00134	MNXR6148	1.2.1.2;1.2.1.43
R00135	MNXR59113	3.4.11.5
R00137	MNXR3827	2.7.7.1;2.7.7.18
R00139	MNXR59114	2.7.4.6
R00149	MNXR6370	6.3.4.16
R00150	MNXR1064	2.7.2.2
R00156	MNXR69530	2.7.4.6
R00158	MNXR70052	2.7.4.14;2.7.4.22;2.7.4.25;2.7.4.4
R00161	MNXR69002	2.7.7.2
R00162	MNXR73616	2.7.11.1;2.7.11.10;2.7.11.11;2.7.11.12;2.7.11.13;2.7.11.17;2.7.11.21;2.7.11.22;2.7.11.24;2.7.11.25;2.7.11.30;2.7.11.8;2.7.11.9;2.7.12.1;2.7.12.2
R00174	MNXR4538	2.7.1.35
R00177	MNXR3487	2.5.1.6
R00178	MNXR484	4.1.1.50
R00181	MNXR714	3.5.4.17;3.5.4.6
R00182	MNXR717	3.2.2.4
R00183	MNXR3880	3.1.3.1;3.1.3.2;3.1.3.31;3.1.3.5;3.1.3.6;3.6.1.11;3.6.1.5;3.6.1.9
R00185	MNXR486	2.7.1.20;2.7.1.74
R00189	MNXR3769	6.3.1.5;6.3.5.1
R00190	MNXR68290	2.4.2.7;2.4.2.8
R00192	MNXR68320	3.3.1.1
R00194	MNXR579	3.2.2.9
R00196	MNXR69303	1.1.2.3
R00197	MNXR68632	1.1.2.4;1.1.2.5
R00199	MNXR4414	2.7.9.2
R00200	MNXR4545	2.7.1.40
R00206	MNXR4389	2.7.9.1
R00212	MNXR4175	1.97.1.4;2.3.1.54
R00214	MNXR3470	1.1.1.38;1.1.1.39;1.1.1.40;4.1.1.3
R00215	MNXR3382	1.1.1.83
R00216	MNXR3471	1.1.1.38;1.1.1.39;1.1.1.40;4.1.1.3
R00217	MNXR3932	1.1.1.38;1.1.1.40;4.1.1.3
R00220	MNXR4812	4.2.1.13;4.3.1.15;4.3.1.17;4.3.1.19
R00221	MNXR4811	4.3.1.18
R00226	MNXR68259	2.2.1.6;4.1.3.18
R00228	MNXR353	1.2.1.10
R00229	MNXR9724	6.2.1.13
R00230	MNXR4502	2.3.1.8
R00233	MNXR3439	4.1.1.9
R00235	MNXR453	6.2.1.1
R00237	MNXR1173	4.1.3.22;4.1.3.24;4.1.3.25
R00238	MNXR341	2.3.1.16;2.3.1.9
R00239	MNXR32778	2.7.2.11
R00243	MNXR32818	1.4.1.2;1.4.1.3;1.4.1.4
R00245	MNXR32297	1.5.1.12
R00248	MNXR33333	1.4.1.13;1.4.1.2;1.4.1.3;1.4.1.4
R00251	MNXR33124	3.5.2.9
R00253	MNXR32767	6.3.1.2
R00256	MNXR32746	1.4.1.13;1.4.7.1;3.5.1.2;3.5.1.38;4.3.3.6;6.3.5.4;6.3.5.5
R00257	MNXR33034	6.3.5.1
R00258	MNXR32635	2.6.1.2
R00259	MNXR30582	2.1.4.1;2.3.1.1
R00260	MNXR31606	5.1.1.3
R00261	MNXR31600	4.1.1.15;4.1.1.19
R00262	MNXR32815	5.4.99.1
R00264	MNXR5727	1.2.1.26;1.2.1.3
R00267	MNXR31729	1.1.1.42
R00268	MNXR5404	1.1.1.41;1.1.1.42;4.1.1.-
R00271	MNXR2925	2.3.3.14
R00272	MNXR4004	4.1.1.71
R00274	MNXR2828	1.11.1.9
R00275	MNXR4893	1.15.1.1
R00277	MNXR4532	1.4.3.5
R00278	MNXR4138	1.4.3.5
R00281	MNXR73627	1.6.99.3;1.6.99.5
R00286	MNXR70030	1.1.1.22
R00287	MNXR70033	3.6.1.45;3.6.1.8;3.6.1.9
R00289	MNXR69105	2.7.7.9
R00291	MNXR70029	5.1.3.2
R00292	MNXR73631	2.4.1.11
R00293	MNXR73632	4.2.1.76
R00294	MNXR70905	1.7.2.5
R00295	MNXR73633	1.8.99.3
R00296	MNXR73634
R00298	MNXR73636	1.1.99.2
R00299	MNXR69234	2.7.1.1;2.7.1.2
R00304	MNXR33042	3.1.3.1;3.1.3.10;3.1.3.2;3.1.3.25;3.1.3.26;3.1.3.8
R00306	MNXR14569	3.2.1.21;3.2.1.74
R00310	MNXR70157	4.99.1.1
R00315	MNXR390	2.7.2.1;2.7.2.15
R00317	MNXR461	3.6.1.7
R00318	MNXR6705	3.11.1.2
R00321	MNXR708	3.5.1.13;3.5.1.4;3.5.1.49
R00325	MNXR5769	4.1.3.22
R00330	MNXR69528	2.7.4.6;2.7.4.8
R00331	MNXR8314	2.7.4.6
R00332	MNXR69138	2.7.4.8
R00336	MNXR69771	3.1.7.2
R00341	MNXR4383	4.1.1.49
R00342	MNXR3464	1.1.1.299;1.1.1.37;1.1.1.38
R00343	MNXR3468	1.1.1.299;1.1.1.82
R00344	MNXR4112	6.4.1.1
R00345	MNXR4381	4.1.1.31
R00350	MNXR3939	4.1.3.17;4.1.3.B3
R00351	MNXR1298	2.3.3.1;2.3.3.3;4.1.3.7
R00352	MNXR389	2.3.3.8;4.1.3.6
R00354	MNXR7118	4.1.3.34
R00355	MNXR32641	2.6.1.1
R00360	MNXR6929	1.1.3.3
R00361	MNXR73645	1.1.5.4
R00366	MNXR2774	1.4.3.19;1.4.3.3
R00369	MNXR574	2.6.1.44
R00371	MNXR69171	2.3.1.29;2.3.1.37
R00374	MNXR73646	1.4.99.5
R00375	MNXR14582	2.7.7.7
R00376	MNXR14583	2.7.7.7
R00377	MNXR14584	2.7.7.7
R00378	MNXR14585	2.7.7.7
R00379	MNXR73647	2.7.7.31;2.7.7.49;2.7.7.7
R00380	MNXR55243	2.1.1.37
R00381	MNXR73648	6.5.1.1
R00382	MNXR73649	6.5.1.2
R00388	MNXR47440	1.3.3.6
R00390	MNXR73493	6.2.1.2;6.2.1.3
R00391	MNXR3169	2.3.1.16
R00392	MNXR59143	1.3.8.7;1.3.8.8
R00393	MNXR71363	2.8.3.8
R00396	MNXR621	1.4.1.1
R00397	MNXR5617	4.1.1.12
R00401	MNXR626	5.1.1.1
R00405	MNXR4958	6.2.1.4;6.2.1.5
R00406	MNXR14596	2.8.3.-
R00409	MNXR3442	4.1.3.30
R00410	MNXR3946	2.8.3.5
R00416	MNXR70013	2.7.7.23
R00418	MNXR5195	5.1.3.2;5.1.3.7
R00420	MNXR55976	5.1.3.14
R00421	MNXR56579	1.1.1.136
R00424	MNXR2834	3.5.4.16
R00425	MNXR2835	3.5.4.25
R00429	MNXR69192	2.7.6.5
R00431	MNXR69652	4.1.1.32
R00432	MNXR69923	6.2.1.4
R00435	MNXR73658	2.7.7.19;2.7.7.48;2.7.7.6
R00437	MNXR73660	2.7.7.8
R00438	MNXR73661	2.7.7.8
R00439	MNXR73662	2.7.7.8
R00440	MNXR73663	2.7.7.8
R00441	MNXR73664	2.7.7.48;2.7.7.6
R00442	MNXR73665	2.7.7.48;2.7.7.6
R00443	MNXR14611	2.7.7.48;2.7.7.52;2.7.7.6
R00444	MNXR14612	2.7.7.48;2.7.7.6
R00448	MNXR6565	1.14.13.59
R00449	MNXR3347	1.13.12.2
R00451	MNXR1430	4.1.1.20
R00457	MNXR73668	2.6.1.36
R00460	MNXR3352	5.1.1.5;5.1.1.9
R00461	MNXR3345	5.4.3.2
R00462	MNXR3346	4.1.1.18
R00465	MNXR2760	1.1.1.26;1.1.1.79
R00469	MNXR5248	3.5.3.19
R00470	MNXR1487	4.1.1.3;4.1.2.14;4.1.3.16
R00471	MNXR56317	4.1.1.3;4.1.2.14;4.1.3.16
R00472	MNXR3388	2.3.3.9;4.1.3.2
R00473	MNXR7109	4.1.3.24
R00475	MNXR2764	1.1.3;1.1.3.15
R00476	MNXR73669	1.1.99.14
R00478	MNXR7430	4.1.3.14
R00479	MNXR31733	4.1.3.1
R00480	MNXR861	2.7.2.4
R00481	MNXR55085	1.4.3.16
R00483	MNXR844	6.3.1.1;6.3.5.4
R00485	MNXR842	3.5.1.1;3.5.1.38;3.5.5.4
R00486	MNXR71389	3.5.5.4
R00489	MNXR855	4.1.1.11;4.1.1.15
R00490	MNXR869	3.5.1.38;4.3.1.1
R00491	MNXR6487	5.1.1.13
R00497	MNXR2832	6.3.2.3
R00505	MNXR55999	5.4.99.9
R00509	MNXR513	2.7.1.25
R00511	MNXR3877	3.1.3.1;3.1.3.2;3.1.3.5
R00512	MNXR68619	2.7.4.14;2.7.4.25;2.7.4.3
R00519	MNXR2200	1.2.1.2
R00522	MNXR3998	4.1.1.2
R00524	MNXR2273	3.5.1.49
R00525	MNXR31971	3.5.1.68
R00527	MNXR4826	3.1.2.12
R00528	MNXR69925	1.8.3.1
R00529	MNXR4764	2.7.7.4
R00533	MNXR70144	1.8.3.1
R00538	MNXR70176	1.2.1.3;1.2.1.5
R00539	MNXR70703	3.6.1.7
R00540	MNXR70676	3.5.5.1;3.5.5.2;3.5.5.5;3.5.5.7
R00543	MNXR70781	3.7.1.5
R00548	MNXR68280	3.1.3;3.1.3.2
R00549	MNXR69844	2.7.1.26
R00551	MNXR780	3.5.3.1
R00552	MNXR777	3.5.3.15;3.5.3.6
R00566	MNXR778	4.1.1.19
R00570	MNXR69531	2.7.4.3;2.7.4.6
R00571	MNXR1317	6.3.4.2
R00573	MNXR32700	6.3.4.2
R00575	MNXR33037	6.3.5.5
R00578	MNXR33036	6.3.5.4
R00582	MNXR4486	3.1.3.2;3.1.3.26;3.1.3.3;3.1.3.8
R00585	MNXR4896	2.6.1.51
R00586	MNXR4808	2.3.1.30
R00588	MNXR5465	2.6.1.45
R00589	MNXR8753	5.1.1.10;5.1.1.18
R00604	MNXR651	1.2.1.1;1.2.1.22;1.2.1.24;1.2.1.3;1.2.1.32;1.2.1.46;1.5.1.12
R00605	MNXR640	1.1.1.244
R00610	MNXR4772	1.5.3.1
R00617	MNXR69991	2.7.4.16
R00623	MNXR5765	1.1.1.1;1.1.1.71
R00625	MNXR14636	1.1.1.2;1.1.1.71
R00626	MNXR70545	3.1.3.1;3.1.3.2
R00631	MNXR70176	1.2.1.3;1.2.1.5
R00634	MNXR70801	1.2.1.4;1.2.1.5
R00635	MNXR70836	1.2.3.1
R00647	MNXR70242	1.1.3.8
R00649	MNXR7670	2.1.1.12
R00650	MNXR69219	2.1.1;2.1.1.10
R00651	MNXR585	2.5.1.49;4.2.99.10
R00654	MNXR3491	4.4.1.11
R00658	MNXR1898	4.2.1.11
R00660	MNXR55980	2.5.1.7
R00661	MNXR57192	5.4.2.9
R00667	MNXR32762	2.6.1.13
R00669	MNXR437	3.5.1.14;3.5.1.16
R00670	MNXR3986	4.1.1.17
R00671	MNXR3985	4.3.1.12
R00672	MNXR6486	5.1.1.10;5.1.1.12;5.1.1.9
R00673	MNXR5136	4.1.99.1
R00674	MNXR5140	4.2.1.122;4.2.1.20
R00678	MNXR5138	1.13.11.11;1.13.11.52
R00691	MNXR8552	4.2.1.51;4.2.1.91
R00694	MNXR32168	2.6.1.1;2.6.1.24;2.6.1.42;2.6.1.5;2.6.1.57;2.6.1.58;2.6.1.60;2.6.1.7;2.6.1.9
R00697	MNXR7145	4.3.1.24;4.3.1.25;4.3.1.5
R00700	MNXR70978	1.12.1.2;1.12.1.5
R00702	MNXR59177	2.5.1.103;2.5.1.21;2.5.1.96
R00703	MNXR3215	1.1.1.27
R00704	MNXR3212	1.1.1.28
R00705	MNXR3607	1.2.1;1.2.1.18;1.2.1.27
R00706	MNXR5704	1.2.1;1.2.1.18
R00709	MNXR31728	1.1.1.286;1.1.1.41
R00710	MNXR657	1.17.1.4;1.2.1.18;1.2.1.19;1.2.1.21;1.2.1.22;1.2.1.24;1.2.1.28;1.2.1.3;1.2.1.31;1.2.1.32;1.2.1.36;1.2.1.39;1.2.1.41;1.2.1.46;1.2.1.47;1.2.1.48;1.2.1.5;1.2.1.69;1.2.1.8;1.5.1.12
R00711	MNXR658	1.2.1.3;1.2.1.4;1.2.1.5
R00713	MNXR4909	1.2.1.16;1.2.1.24
R00714	MNXR4910	1.2.1.16;1.2.1.79
R00715	MNXR4761	1.5.1.7
R00716	MNXR4762	1.5.1.7;1.5.1.8
R00717	MNXR2759	1.1.1.26;1.1.1.29;1.1.1.79
R00722	MNXR69536	2.7.4.6
R00732	MNXR7251	1.3.1.43;1.3.1.79
R00733	MNXR8606	1.3.1.43;1.3.1.78;1.3.1.79
R00734	MNXR32524	2.6.1.1;2.6.1.5;2.6.1.57;2.6.1.9
R00736	MNXR5171	4.1.1.25;4.1.1.28
R00742	MNXR358	6.4.1.2
R00746	MNXR649	1.1.1.2;1.1.1.71
R00747	MNXR6727	3.11.1.1
R00749	MNXR1921	4.3.1.7
R00750	MNXR2997	4.1.3.39
R00751	MNXR5055	4.1.2.48;4.1.2.5
R00754	MNXR648	1.1.1.1;1.1.1.6;1.1.1.71;1.1.1.78
R00756	MNXR69661	2.7.1.11
R00758	MNXR69388	1.1.1.17
R00760	MNXR69235	2.7.1.1;2.7.1.4
R00761	MNXR70815	4.1.2.22
R00762	MNXR68950	3.1.3.11
R00764	MNXR71275	2.7.1.90
R00765	MNXR69080	3.5.99.6
R00766	MNXR73688	2.4.1.14
R00768	MNXR69127	2.6.1.16
R00771	MNXR69671	5.3.1.9
R00772	MNXR69401	5.3.1.8
R00774	MNXR5299	6.3.4.6
R00776	MNXR5684	4.3.2.3
R00783	MNXR71323	1.7.2.1
R00784	MNXR14662	1.7.2.1
R00787	MNXR69565	1.7.1.4
R00790	MNXR70895	1.7.7.1
R00791	MNXR70991	1.7.7.2
R00792	MNXR14664	1.9.6.1
R00794	MNXR10236	1.17.3.2;1.7.1.1;1.7.1.2
R00796	MNXR6576	1.7.1.1;1.7.1.2;1.7.1.3
R00798	MNXR73693	1.7.99.4
R00801	MNXR69924	3.2.1.10;3.2.1.20;3.2.1.26;3.2.1.48
R00802	MNXR11052	3.2.1.20;3.2.1.21;3.2.1.26;3.2.1.48
R00803	MNXR71199	2.4.1.7
R00807	MNXR73696	1.1.99.13
R00808	MNXR73697	1.1.99.13
R00811	MNXR71271	2.7.1.69
R00812	MNXR7236	1.3.1.19
R00813	MNXR989	1.3.1.25
R00815	MNXR7488	1.14.13.7
R00816	MNXR68471	1.13.11.2
R00817	MNXR1048	1.13.11.1
R00818	MNXR7212	1.14.13.1
R00823	MNXR6101	1.14.12.1
R00825	MNXR5836	1.14.12.1
R00828	MNXR7497	1.14.13.31
R00829	MNXR209	2.3.1.-;2.3.1.16;2.3.1.174
R00830	MNXR628	2.3.1.37
R00832	MNXR879	2.3.1.109
R00833	MNXR3604	5.4.99.2
R00835	MNXR69082	1.1.1.49
R00836	MNXR69996	2.4.1.15
R00837	MNXR69995	3.2.1.122;3.2.1.93
R00839	MNXR70612	3.2.1.86
R00842	MNXR2438	1.1.1.261;1.1.1.8;1.1.1.94
R00844	MNXR2439	1.1.1.261;1.1.1.94
R00847	MNXR69177	2.7.1.30
R00849	MNXR30340	1.1.5.3
R00851	MNXR6027	2.3.1.15
R00856	MNXR69072	2.7.7.39
R00857	MNXR59196	3.1.4.46
R00858	MNXR69926	1.8.1.2;1.8.2.2
R00859	MNXR70927	1.8.7.1
R00860	MNXR73699	1.8.99.2
R00867	MNXR37417	2.7.1.1;2.7.1.4
R00868	MNXR20535	1.1.1.11;1.1.1.67
R00874	MNXR70522	1.1.99.28
R00879	MNXR73706	3.2.1.80
R00880	MNXR6837	1.1.1.132
R00885	MNXR3412	2.7.7.13;2.7.7.28
R00888	MNXR2783	4.2.1.47
R00889	MNXR6547	5.1.3.18
R00893	MNXR1352	1.13.11.20
R00894	MNXR32879	6.3.2.2
R00895	MNXR30967	2.6.1.1;2.6.1.3
R00897	MNXR30965	2.5.1.47;2.5.1.49;2.5.1.65;4.2.99.8
R00899	MNXR718	3.4.11.1;3.4.11.2;3.4.11.23;3.4.13.-;3.4.13.18;3.4.13.3
R00904	MNXR938	1.2.1;1.2.1.19;1.2.1.3;1.2.1.5;1.2.1.8
R00905	MNXR5290	3.5.1.6
R00907	MNXR738	2.6.1.18
R00922	MNXR69474	1.2.1.18;1.2.1.27
R00924	MNXR69770	1.3.8.7;1.3.99.3
R00925	MNXR360	6.2.1.1;6.2.1.17
R00927	MNXR342	2.3.1.16;2.3.1.9
R00928	MNXR8460	2.8.3.1
R00930	MNXR5702	2.1.3.1
R00931	MNXR10437	2.3.3.5;4.1.3.31
R00934	MNXR14704	4.1.3.24
R00935	MNXR3609	1.2.1.27
R00939	MNXR1561	1.5.1.3
R00942	MNXR69963	6.3.2.17
R00943	MNXR2319	3.5.4.9;6.3.4.3
R00944	MNXR2317	3.5.1.10
R00945	MNXR2619	2.1.2.1
R00946	MNXR69434	2.1.1.13
R00947	MNXR35543	3.1.3.10
R00948	MNXR33815	2.7.7.27
R00955	MNXR70038	2.7.7.12
R00956	MNXR71287	2.7.7.33
R00959	MNXR34277	5.4.2.10;5.4.2.2;5.4.2.5;5.4.2.6;5.4.2.8
R00963	MNXR3875	3.1.3.1;3.1.3.2;3.1.3.25;3.1.3.31;3.1.3.5;3.1.4.16
R00964	MNXR5306	2.7.1.48
R00965	MNXR3967	4.1.1.23
R00966	MNXR70061	2.4.2.9
R00974	MNXR1306	3.5.4.1
R00977	MNXR5810	1.3.1.1
R00978	MNXR1810	1.3.1.1;1.3.1.2
R00982	MNXR8589	6.2.1.32
R00986	MNXR32743	4.1.3.27
R00987	MNXR3184	3.7.1.3
R00996	MNXR5058	4.3.1.19
R00997	MNXR8529	3.5.99.7
R01001	MNXR1358	4.4.1.1
R01005	MNXR73715	2.4.1.117
R01009	MNXR73718	2.4.1.83
R01011	MNXR1537	2.7.1.29
R01015	MNXR5115	5.3.1.1
R01016	MNXR3520	4.2.3.3
R01025	MNXR73721	1.1.99.1
R01028	MNXR1156	3.1.6.6
R01030	MNXR2802	3.1.4.2;3.1.4.46
R01034	MNXR69172	1.1.1.1;1.1.1.14;1.1.1.287;1.1.1.6;1.1.99.22
R01036	MNXR68334	1.1.1.1;1.1.1.2;1.1.1.21;1.1.1.6;1.1.1.72
R01041	MNXR68335	1.1.1.1;1.1.1.2;1.1.1.21;1.1.1.72
R01047	MNXR70808	4.2.1.30
R01049	MNXR71283	2.7.6.1
R01051	MNXR71263	2.7.1.15
R01054	MNXR70679	3.6.1.-;3.6.1.13;3.6.1.21;3.6.1.53
R01055	MNXR5384	3.2.-.-;4.2.1.70
R01056	MNXR4654	5.3.1.6
R01057	MNXR4395	5.4.2.2;5.4.2.7
R01058	MNXR6972	1.2.1.9
R01061	MNXR2549	1.2.1.12;1.2.1.13;1.2.1.59
R01063	MNXR2550	1.2.1.13;1.2.1.59
R01064	MNXR33277	4.1.2.21
R01066	MNXR26311	4.1.2.4
R01068	MNXR70811	4.1.2.13
R01069	MNXR5031	4.1.2.40
R01070	MNXR2184	4.1.2.13
R01071	MNXR68424	2.4.2.17
R01072	MNXR69167	2.4.2.14
R01073	MNXR68365	2.4.2.18
R01078	MNXR59220	2.8.1.6
R01080	MNXR70066	3.2.2.3;3.2.2.8
R01082	MNXR2338	4.2.1.2
R01083	MNXR514	4.3.2.2
R01085	MNXR14732	3.7.1.20;3.7.1.5
R01086	MNXR782	4.3.2.1
R01087	MNXR3385	5.2.1.1
R01088	MNXR5732	1.4.1.9
R01090	MNXR31792	2.6.1.42;2.6.1.6;2.6.1.67
R01092	MNXR32659	2.7.1.6
R01093	MNXR35560	1.1.1.21
R01094	MNXR35561	1.1.1.48
R01099	MNXR39708	1.1.3.9
R01100	MNXR31780	3.2.1.108;3.2.1.23
R01101	MNXR31035	3.2.1.22
R01103	MNXR32322	3.2.1.22
R01104	MNXR69130	3.2.1.22
R01105	MNXR73725	3.2.1.23
R01106	MNXR73726	1.7.99.4
R01121	MNXR68753	4.1.1.33
R01122	MNXR73728	2.5.1.75
R01123	MNXR69289	5.3.3.2
R01126	MNXR3873	3.1.3.1;3.1.3.31;3.1.3.5
R01127	MNXR3099	2.1.2.3;3.5.4.10
R01130	MNXR3100	1.1.1.205
R01132	MNXR69265	2.4.2.8
R01135	MNXR68295	6.3.4.4
R01137	MNXR55765	2.7.4.6
R01142	MNXR6057	1.14.13.25
R01143	MNXR7502	1.14.13.25;1.14.18.3
R01148	MNXR629	2.6.1.21
R01150	MNXR614	6.3.2.4
R01151	MNXR4517	1.4.3.10;1.4.3.22;1.4.3.6
R01152	MNXR6619	3.5.1.53
R01155	MNXR32288	2.6.1.29;2.6.1.82
R01157	MNXR558	3.5.3.11
R01158	MNXR2968	1.1.1.23
R01164	MNXR5705	6.3.2.11
R01167	MNXR2964	4.1.1.22;4.1.1.28
R01168	MNXR2963	4.3.1.3
R01172	MNXR5687	1.2.1.10;1.2.1.57
R01173	MNXR6304	1.2.1.10;1.2.1.57
R01174	MNXR5821	2.3.1.19
R01175	MNXR68266	1.3.3.6;1.3.8.1;1.3.8.7;1.3.99.-;1.3.99.2;1.3.99.3
R01177	MNXR343	2.3.1.155;2.3.1.16;2.3.1.9
R01178	MNXR56680	1.3.8.1
R01179	MNXR980	2.8.3.8
R01183	MNXR3109	1.1.1;1.1.1.18
R01184	MNXR57632	1.13.99.1
R01185	MNXR3542	3.1.3.25
R01186	MNXR3547	3.1.3.25
R01187	MNXR3546	2.7.1.64;3.1.3.25
R01194	MNXR31508	3.2.1.22
R01195	MNXR69009	1.18.1.2
R01196	MNXR70762	1.2.7.-;1.2.7.1
R01197	MNXR69593	1.2.7.3
R01201	MNXR376	2.7.1.59
R01206	MNXR73732	3.2.1.14
R01209	MNXR1535	4.2.1.9
R01210	MNXR3956	1.2.1.25
R01213	MNXR3135	2.3.3.13;4.1.3.12
R01215	MNXR5342	2.6.1.66
R01218	MNXR3643	1.5.1.15;1.5.1.5
R01220	MNXR3642	1.5.1.5
R01224	MNXR3645	1.5.1.20;1.7.99.5
R01226	MNXR3626	2.1.2.11
R01227	MNXR3882	3.1.3.1;3.1.3.2;3.1.3.25;3.1.3.31;3.1.3.5;3.1.3.6;3.6.1.11
R01230	MNXR2788	6.3.4.1;6.3.5.2
R01231	MNXR32727	6.3.4.1;6.3.5.2
R01243	MNXR73737	3.1.6.1
R01244	MNXR473	3.5.4.2
R01245	MNXR68287	3.2.2.1;3.2.2.7;3.2.2.8
R01248	MNXR4062	1.5.1.2;1.5.99.8
R01251	MNXR70478	1.5.1.2
R01253	MNXR73738	1.5.99.8
R01255	MNXR5681	5.1.1.4
R01256	MNXR9750	6.2.1.9
R01262	MNXR73741	2.3.2.2
R01267	MNXR71061	3.5.5.4;4.2.1.65
R01268	MNXR3835	3.5.1.19
R01271	MNXR69542	2.4.2.12
R01278	MNXR14765	1.3.1.38;1.3.1.8
R01279	MNXR68272	1.3.3.6;1.3.8;1.3.8.7;1.3.8.8;1.3.8.9;1.3.99.-;1.3.99.13;1.3.99.3
R01280	MNXR2003	6.2.1.12;6.2.1.3
R01281	MNXR4817	2.3.1.50
R01286	MNXR68614	4.4.1.8
R01290	MNXR68615	4.2.1.22
R01293	MNXR5337	1.17.1.4;1.2.1.28;1.2.1.64;1.2.1.67
R01298	MNXR230	1.14.13.2;1.14.13.33
R01300	MNXR8588	6.2.1.27
R01301	MNXR232	3.1.2.23
R01302	MNXR1161	4.1.3.40
R01305	MNXR7540	1.13.11.41
R01310	MNXR70331	3.1.4.4
R01312	MNXR70334	3.1.4.3
R01322	MNXR9738	6.2.1.18
R01323	MNXR8345	2.8.3.10
R01324	MNXR30608	4.2.1.3
R01325	MNXR443	4.2.1.3;4.2.1.4
R01329	MNXR68809	3.2.1.22
R01333	MNXR2565	1.2.1.21
R01334	MNXR4193	3.1.3.18
R01340	MNXR14787	1.4.3.3
R01341	MNXR14788	1.1.3.15
R01343	MNXR14790	2.6.1.13
R01351	MNXR70323	3.1.1.23;3.1.1.79
R01352	MNXR73763	3.1.1;3.1.1.23
R01353	MNXR4375	2.7.2.1;2.7.2.15
R01355	MNXR7434	4.1.3.32
R01357	MNXR302	6.2.1.16
R01359	MNXR340	2.8.3;2.8.3.8
R01360	MNXR2984	4.1.3.4
R01361	MNXR943	1.1.1.30
R01364	MNXR2339	3.7.1.2
R01365	MNXR8348	2.8.3.9
R01366	MNXR472	4.1.1.4
R01369	MNXR70518	3.1.1.3;3.1.1.34;3.1.1.79
R01373	MNXR4404	1.3.1.12;4.2.1.51;4.2.1.91
R01374	MNXR73765	1.4.99.1
R01377	MNXR7047	4.1.1.-;4.1.1.43
R01384	MNXR5232	4.1.1.35
R01385	MNXR5459	5.1.3.6
R01388	MNXR2769	1.1.1.26;1.1.1.29;1.1.1.79;1.1.1.81
R01392	MNXR3016	1.1.1.79;1.1.1.81;1.1.1.92
R01394	MNXR3014	5.3.1.22
R01397	MNXR856	2.1.3.2
R01398	MNXR3940	2.1.3.3
R01401	MNXR55735	3.2.2.16;3.2.2.9
R01402	MNXR3639	2.4.2.28
R01403	MNXR56671	1.3.1.9
R01404	MNXR56664	1.3.1.10;1.3.1.39
R01406	MNXR73767	6.2.1.20
R01414	MNXR9422	1.3.1.1
R01416	MNXR6639	3.5.3.12
R01420	MNXR6971	1.2.1.28;1.2.1.5;1.2.1.7
R01421	MNXR73770	3.6.1.7
R01422	MNXR9744	6.2.1.25
R01424	MNXR3787	3.5.1.32
R01432	MNXR32942	5.3.1.5
R01433	MNXR73772	3.2.1.37
R01446	MNXR3204	1.2.1.21;1.2.1.22
R01456	MNXR1552	1.3.1.21
R01459	MNXR6103	1.1.3.6
R01465	MNXR69968	1.1.1.103
R01466	MNXR5064	4.2.3.1;4.2.99.2
R01470	MNXR2803	3.1.4.2;3.1.4.46
R01473	MNXR5520	5.1.3.5
R01476	MNXR70344	2.7.1.43
R01478	MNXR70713	3.2.1.31
R01481	MNXR56584	1.1.1.19
R01482	MNXR56515	5.3.1.12
R01497	MNXR73779	2.4.1.80
R01498	MNXR73780	3.2.1.45;3.2.1.62
R01504	MNXR1543	2.7.7.58
R01512	MNXR4189	2.7.2.3
R01513	MNXR4184	1.1.1.95
R01514	MNXR2756	2.7.1.31
R01515	MNXR460	3.6.1.7
R01518	MNXR4195	5.4.2.1;5.4.2.4
R01519	MNXR5689	3.1.1.17
R01520	MNXR14840	1.1.1.118;1.1.1.47
R01521	MNXR6068	1.1.1.119;1.1.1.47
R01523	MNXR8268	2.7.1.19
R01526	MNXR4586	2.7.1.16;2.7.1.47
R01528	MNXR2793	1.1.1.44
R01529	MNXR4653	5.1.3.1
R01530	MNXR300	5.3.1.13
R01538	MNXR7637	4.2.1.39
R01540	MNXR686	4.2.1.7
R01541	MNXR1485	2.7.1.45
R01542	MNXR6834	1.1.1.125;1.1.1.127
R01550	MNXR643	1.1.1.2;1.1.1.80
R01555	MNXR14845	2.4.1.8
R01557	MNXR3648	5.4.99.16;5.4.99.6
R01560	MNXR466	3.5.4.4
R01561	MNXR4522	2.4.2.1;2.4.2.28
R01566	MNXR7024	3.5.3.3
R01567	MNXR5091	2.7.1.145;2.7.1.21;2.7.1.76
R01570	MNXR69980	2.4.2.2;2.4.2.4
R01577	MNXR68375	5.3.1.3
R01599	MNXR73787	1.14.99.1
R01600	MNXR5673	2.7.1.1;2.7.1.2
R01602	MNXR6549	5.1.3.3
R01608	MNXR161	1.1.1.59
R01613	MNXR7823	2.3.1.74
R01616	MNXR227	6.2.1.12
R01621	MNXR5894	4.1.2.22;4.1.2.9
R01625	MNXR35618	2.7.8.-;2.7.8.7
R01626	MNXR69412	2.3.1.0;2.3.1.39;2.3.1.85;2.3.1.86
R01627	MNXR68718	4.2.1.118
R01631	MNXR4119	1.13.11.3
R01632	MNXR56771	1.13.11.8
R01639	MNXR5372	2.7.1.17
R01641	MNXR5082	2.2.1.1
R01644	MNXR5495	1.1.1.61
R01645	MNXR73788	4.1.2;4.1.2.-
R01648	MNXR30569	2.6.1.19
R01652	MNXR3962	1.1.1.85
R01655	MNXR3641	3.5.4.9;6.3.4.3
R01658	MNXR55238	2.5.1.1;2.5.1.10;2.5.1.29
R01662	MNXR1775	5.4.2.1;5.4.2.4
R01663	MNXR1461	3.5.4.12;3.5.4.14
R01665	MNXR68625	2.7.4.13;2.7.4.14;2.7.4.25;2.7.4.B1
R01676	MNXR2844	3.5.4.3
R01677	MNXR69180	3.2.2.1;3.2.2.2;3.2.2.8
R01678	MNXR35625	3.2.1.108;3.2.1.23
R01684	MNXR33690	2.6.1.55
R01687	MNXR73792	2.3.2.2
R01697	MNXR73795	1.1.99.21
R01699	MNXR48457	1.2.4.1
R01700	MNXR48458	1.2.4.2
R01701	MNXR48459	1.2.4.4
R01707	MNXR6819	1.1.1.107
R01709	MNXR4537	1.2.3.1;1.2.3.8
R01714	MNXR1160	4.2.3.5
R01715	MNXR1159	5.4.99.5
R01716	MNXR30623	2.6.1.85
R01717	MNXR3070	5.4.4.2;5.4.99.6
R01724	MNXR69522	2.4.2.11
R01728	MNXR4402	1.3.1.12;1.3.1.43;1.3.1.52
R01730	MNXR4403	1.3.1.13;1.3.1.43
R01731	MNXR8691	2.6.1.57;2.6.1.78
R01736	MNXR2772	3.1.2.6
R01737	MNXR2794	2.7.1.12
R01738	MNXR26514	1.1.1.69
R01739	MNXR6884	1.1.1.215
R01740	MNXR7181	1.1.1.69
R01741	MNXR69089	1.1.99.3
R01742	MNXR73799	1.1.99.3
R01745	MNXR5147	1.1.1;1.1.1.60
R01747	MNXR6034	1.1.1.60
R01751	MNXR8535	4.1.1.73
R01752	MNXR2740	1.2.1.3
R01754	MNXR14882	2.7.1.46
R01758	MNXR14884	1.1.1.21;1.1.1.255
R01761	MNXR5440	5.3.1.4
R01762	MNXR73800	3.2.1.55
R01764	MNXR7078	4.1.1.7
R01770	MNXR69281	3.2.2.1;3.2.2.2;3.2.2.8
R01771	MNXR3047	2.7.1.39
R01773	MNXR3044	1.1.1.3
R01775	MNXR3045	1.1.1.3
R01776	MNXR3046	2.3.1.31
R01777	MNXR3051	2.3.1.46
R01778	MNXR2910	1.1.1.211;1.1.1.35
R01779	MNXR6908	1.1.1.330;1.1.1.36
R01780	MNXR73801	2.8.3.5
R01786	MNXR14890	2.7.1.1;2.7.1.2
R01790	MNXR73802	3.2.1.10;3.2.1.3
R01791	MNXR73802	3.2.1.10;3.2.1.3
R01793	MNXR68712	1.5.1.34
R01797	MNXR6664	3.6.1.26
R01799	MNXR70333	2.7.7.41
R01800	MNXR69809	2.7.8.8
R01801	MNXR1099	2.7.8.5
R01802	MNXR69719	2.7.8.11
R01804	MNXR26433	2.5.1.56;4.1.3.19
R01811	MNXR26498	4.1.3.3
R01817	MNXR33250	1.1.1.224
R01818	MNXR4351	5.4.2.8
R01819	MNXR35641	5.3.1.8
R01821	MNXR73807	2.4.1.1
R01823	MNXR73808	2.4.1.4
R01824	MNXR73809	5.4.99.15
R01825	MNXR1822	1.2.1.72
R01826	MNXR1486	2.5.1.54;4.1.2.15
R01827	MNXR35645	2.2.1.2
R01836	MNXR3029	1.1.1.239;1.1.1.51;1.1.1.62;1.1.1.63
R01838	MNXR3030	1.1.1.239;1.1.1.51;1.1.1.62;1.1.1.63;1.1.1.64
R01842	MNXR59291	1.14.14.1
R01845	MNXR6398	3.1.3.11;3.1.3.37
R01853	MNXR73812	1.4.3.21
R01856	MNXR69563	3.1.5.1
R01857	MNXR69533	2.7.4.6
R01859	MNXR4384	6.4.1.3
R01863	MNXR4526	2.4.2.1;2.4.2.15;2.4.2.44
R01867	MNXR9364	1.3.98.1
R01868	MNXR30347	1.3.5.2
R01869	MNXR5700	1.3.1.14;1.3.3.2;1.3.99.11
R01870	MNXR69599	2.4.2.10
R01873	MNXR4557	1.1.5.8;1.1.99.25
R01874	MNXR33930	4.4.1.15
R01876	MNXR4548	2.4.2.2;2.4.2.3
R01878	MNXR1374	3.5.4.5
R01884	MNXR6028	3.5.2.10
R01887	MNXR59296	3.5.5.1
R01895	MNXR6913	1.1.1.56
R01896	MNXR5375	1.1.1.9
R01899	MNXR35657	1.1.1.42
R01900	MNXR30609	4.2.1.3
R01901	MNXR5721	2.7.1.53
R01903	MNXR6077	1.1.1.12
R01904	MNXR5499	1.1.1.10
R01908	MNXR5981	4.1.1.8
R01914	MNXR4888	1.5.3.14;1.5.99.6
R01915	MNXR73820	1.5.99.6
R01919	MNXR8129	2.5.1.44;2.5.1.45
R01920	MNXR4892	2.5.1.16
R01931	MNXR68599	2.8.1.1
R01934	MNXR8389	1.1.1.286;1.1.1.87
R01939	MNXR30562	2.6.1.39
R01942	MNXR7659	2.1.1.104
R01954	MNXR783	6.3.4.5
R01956	MNXR31773	2.6.1.7
R01959	MNXR2258	3.5.1.9
R01960	MNXR3185	1.14.13.9
R01966	MNXR59301	3.2.1.165
R01967	MNXR1527	2.7.1.113;2.7.1.145;2.7.1.74
R01971	MNXR6203	1.1.1.110
R01974	MNXR3106	4.1.1.43;4.1.1.74
R01975	MNXR2899	1.1.1.157;1.1.1.211;1.1.1.35
R01976	MNXR5688	1.1.1.157;1.1.1.35
R01977	MNXR11014	1.1.1.36
R01978	MNXR2982	2.3.3.10;4.1.3.5
R01981	MNXR6879	1.1.1.203
R01982	MNXR73823	3.2.1.15;3.2.1.67
R01990	MNXR2848	3.5.3.7
R01993	MNXR1576	3.5.2.3
R01999	MNXR73830	2.3.1.75
R02000	MNXR20782	1.18.1.1;1.18.1.3;1.18.1.4
R02003	MNXR69185	2.5.1.1;2.5.1.10;2.5.1.29
R02016	MNXR5117	1.6.4.5;1.8.1.9
R02017	MNXR55886	1.17.4.1
R02018	MNXR55892	1.17.4.1
R02019	MNXR55888	1.17.4.1
R02021	MNXR69637	1.8.4.8
R02024	MNXR55890	1.17.4.1
R02029	MNXR70547	3.1.3.27
R02032	MNXR14937	1.1.1.43
R02034	MNXR4191	1.1.1.43
R02035	MNXR4190	3.1.1.31
R02036	MNXR1874	4.2.1.12
R02037	MNXR7658	2.1.1.103
R02047	MNXR2961	1.1.1.31;1.1.1.35
R02050	MNXR1400	2.6.1.40
R02055	MNXR4476	4.1.1.65
R02056	MNXR4166	2.1.1.17
R02059	MNXR542	3.5.1.25
R02060	MNXR4183	5.4.2.10
R02061	MNXR55435	2.5.1;2.5.1.29
R02065	MNXR71200	2.5.1.32;2.5.1.99
R02071	MNXR73842	2.7.1.56
R02073	MNXR39690	2.7.1.90
R02077	MNXR33691	2.6.1.49
R02080	MNXR159	4.1.1.25;4.1.1.28
R02081	MNXR14942	1.1.1.88
R02082	MNXR2981	1.1.1.34
R02085	MNXR3519	4.2.1.18
R02093	MNXR69532	2.7.4.6
R02094	MNXR68764	2.7.4.12;2.7.4.13;2.7.4.9
R02100	MNXR1816	3.6.1.19;3.6.1.23
R02101	MNXR5095	2.1.1.45
R02103	MNXR26379	1.17.1.4
R02106	MNXR26467	1.7.3.3
R02107	MNXR26459	1.17.3.2
R02108	MNXR73846	3.2.1.1
R02109	MNXR73847	3.2.1.33
R02110	MNXR73848	2.4.1.18
R02124	MNXR4592	1.1.1.1;1.1.1.105
R02125	MNXR7226	1.2.3.1;1.2.3.11
R02139	MNXR70670	3.5.2.1
R02142	MNXR70076	2.4.2.22;2.4.2.8
R02143	MNXR70077	3.2.2.1;3.2.2.8
R02147	MNXR4524	2.4.2.1;2.4.2.15
R02150	MNXR2965	1.4.3.22;1.4.3.6
R02157	MNXR7703	2.1.1.76
R02161	MNXR73860	1.10.2.2
R02163	MNXR69515	1.6.5.3;1.6.5.8;1.6.5.9;1.6.99.3
R02164	MNXR73861	1.3.5.1
R02165	MNXR73862	1.7.99.4
R02170	MNXR70633	3.5.1.11
R02173	MNXR70000	1.4.3.22;1.4.3.4
R02184	MNXR73871	2.7.4.1
R02185	MNXR73872	2.7.1.63
R02187	MNXR73874	2.7.1.63
R02189	MNXR73876	2.7.1.63
R02208	MNXR7240	1.3.1.22;1.3.1.30
R02222	MNXR14994	1.14.19.1
R02228	MNXR14997	3.1.3.39
R02229	MNXR6902	1.1.1.1;1.1.1.163;1.1.1.243;1.1.1.245;1.1.1.90
R02231	MNXR7505	1.14.13.16;1.14.13.22
R02237	MNXR32670	6.3.2.12;6.3.2.17
R02240	MNXR1417	2.7.1.107
R02241	MNXR7806	2.3.1.51
R02243	MNXR6128	4.1.1.6
R02250	MNXR70325	3.1.1.3;3.1.1.34;3.1.1.79
R02251	MNXR5828	2.3.1.20
R02258	MNXR645	1.1.1.77
R02262	MNXR2194	4.1.2.17
R02269	MNXR1580	3.5.2.2
R02272	MNXR2422	5.4.3.8
R02273	MNXR739	3.5.1.30
R02278	MNXR7131	4.2.1.43
R02279	MNXR7639	4.2.1.41
R02280	MNXR5984	3.5.4.22
R02282	MNXR33559	2.3.1.35
R02283	MNXR30610	2.6.1.11
R02285	MNXR33152	3.5.3.8
R02286	MNXR2274	3.5.3.13
R02287	MNXR32839	2.1.2.5
R02288	MNXR69293	3.5.2.7
R02291	MNXR832	1.2.1.11
R02297	MNXR4528	2.4.2.-;2.4.2.1
R02301	MNXR2316	6.3.3.2
R02302	MNXR2315	4.3.1.4
R02313	MNXR70279	1.5.1.9
R02315	MNXR69877	1.5.1.10;1.5.1.9
R02322	MNXR3828	3.5.1.42
R02323	MNXR15016	3.1.3.5
R02324	MNXR4644	2.7.1.22
R02325	MNXR1475	3.5.4.13;3.5.4.14
R02326	MNXR69535	2.7.4.6
R02328	MNXR69063	2.7.7.24
R02331	MNXR69534	2.7.4.6
R02333	MNXR70619	3.5.1.41
R02334	MNXR73897	3.2.1.14
R02335	MNXR73898	2.4.1.16
R02336	MNXR37147	3.8.1.3
R02337	MNXR37148	3.8.1.5
R02340	MNXR5141	4.1.2.8;4.2.1.20
R02341	MNXR70789	3.2.2.1
R02354	MNXR5686	1.14.14.1
R02355	MNXR5982	1.14.14.1
R02356	MNXR6187	1.14.14.1
R02360	MNXR73899	3.2.1.15;3.2.1.82
R02376	MNXR7633	4.2.1.28
R02382	MNXR5174	1.4.3;1.4.3.21;1.4.3.22;1.4.3.4;1.4.3.6;1.4.9.2;1.4.99.4
R02395	MNXR33176	1.1.1.108
R02396	MNXR33578	2.3.1.7
R02397	MNXR33463	1.14.11.1
R02401	MNXR4009	1.2.1.20
R02402	MNXR2669	6.2.1.6
R02410	MNXR69841	3.2.1.26
R02412	MNXR4842	2.7.1.71
R02413	MNXR55917	1.1.1.25;1.1.1.282
R02421	MNXR73909	2.4.1.21
R02422	MNXR665	3.5.3.4
R02423	MNXR56553	3.5.3.9
R02425	MNXR68338	3.5.2.5
R02426	MNXR15051	4.2.1.45
R02437	MNXR4630	5.3.1.14
R02439	MNXR5448	2.7.1.16
R02449	MNXR9732	1.14.13.58
R02454	MNXR3421	1.1.1.57
R02457	MNXR1771	1.4.3.3
R02463	MNXR7238	1.3.1.27
R02464	MNXR4829	4.1.2.27
R02468	MNXR7216	1.14.13.48
R02472	MNXR1788	1.1.1.169
R02473	MNXR4088	6.3.2.1
R02484	MNXR68765	2.4.2.1;2.4.2.2;2.4.2.23;2.4.2.4
R02485	MNXR1478	3.5.4.14;3.5.4.5
R02487	MNXR69169	1.3.8.6;1.3.99.7
R02488	MNXR58248	1.3.8.6;1.3.99.7
R02497	MNXR73913	1.3.99.5
R02503	MNXR59370	1.14.14.1
R02519	MNXR2959	1.13.11.5
R02521	MNXR120	1.13.11.27
R02522	MNXR7632	4.2.1.25
R02529	MNXR314	1.4.3.21;1.4.3.4;1.4.3.6
R02530	MNXR3231	4.4.1.5
R02532	MNXR68204	1.4.3.4
R02536	MNXR652	1.2.1.39;1.2.1.5
R02539	MNXR4073	6.2.1.30
R02540	MNXR68357	3.5.1.4
R02541	MNXR70408	3.1.4.12
R02545	MNXR7120	1.1.1.93;1.3.1.7
R02548	MNXR7096	1.1.1.208
R02549	MNXR337	1.2.1.-;1.2.1.19;1.2.1.3
R02555	MNXR4977	1.1.1.57;1.1.1.58
R02558	MNXR8497	3.2.1.118;3.2.1.21
R02565	MNXR946	1.2.1.3;1.2.1.8
R02569	MNXR73919	2.3.1.12
R02570	MNXR73920	2.3.1.61
R02584	MNXR19561	2.7.10.1;2.7.10.2;2.7.12.1;2.7.12.2
R02585	MNXR20666	3.1.3.48
R02589	MNXR7503	1.14.13.24
R02601	MNXR69594	4.2.1;4.2.1.80
R02602	MNXR68214	4.1.1.77
R02603	MNXR69239	3.7.1.-
R02604	MNXR69246	3.7.1.9
R02610	MNXR7417	1.3.1.22
R02613	MNXR4149	1.4.3.21;1.4.3.22;1.4.3.4;1.4.3.6
R02617	MNXR47443	2.3.1.15
R02622	MNXR15090	3.5.1.44
R02623	MNXR71020	2.1.1.80
R02624	MNXR71366	3.1.1.61
R02628	MNXR71277	2.7.3.9
R02630	MNXR73927	2.7.1.69
R02631	MNXR73928	2.7.1.69
R02637	MNXR1722	1.1.1.130
R02639	MNXR5409	1.1.1.130
R02649	MNXR382	2.7.2.8
R02654	MNXR73931	2.4.1.198
R02656	MNXR7211	1.13.11.4
R02657	MNXR15103	1.2.1.29;1.2.3.1
R02658	MNXR8260	2.7.1.13
R02662	MNXR73933	2.3.1.168
R02665	MNXR68179	1.13.11.6
R02675	MNXR73935	1.17.99.1
R02678	MNXR654	1.2.1.3
R02679	MNXR6874	1.1.1.190
R02685	MNXR26370	4.2.1.134;4.2.1.17;4.2.1.74
R02689	MNXR73939	2.4.1.157
R02691	MNXR56929	2.4.1.46
R02694	MNXR47444	2.3.1.20
R02698	MNXR72011	1.14.13.3;1.14.14.9
R02701	MNXR272	4.1.1.28
R02703	MNXR37190	1.1.1.17
R02704	MNXR73942	2.7.1.69
R02718	MNXR6700	6.1.1.13
R02719	MNXR3872	3.1.3.5
R02720	MNXR3896	3.6.1.19
R02722	MNXR5139	4.2.1.20
R02727	MNXR7969	2.4.1.64
R02728	MNXR6562	5.4.2.6
R02729	MNXR6198	2.1.2.4
R02733	MNXR6536	3.5.1.47
R02734	MNXR4792	3.5.1.18
R02735	MNXR1432	5.1.1.7
R02736	MNXR2456	1.1.1.49
R02737	MNXR73952	2.4.1.15
R02738	MNXR73953	2.7.1.69
R02740	MNXR35757	5.3.1.9
R02752	MNXR2675	4.2.1.40
R02755	MNXR7282	1.4.1.16
R02760	MNXR47445	2.3.1.51
R02765	MNXR3601	5.1.99.1
R02767	MNXR19616	1.1.1.100;2.3.1.85;2.3.1.86
R02768	MNXR71045	2.3.1.41
R02777	MNXR69950	1.1.1.133
R02778	MNXR5121	3.1.3.12
R02780	MNXR73959	2.7.1.69
R02781	MNXR15149	2.6.1.50
R02782	MNXR73960	4.2.1;4.2.1.44
R02783	MNXR5205	6.3.2.9
R02788	MNXR5186	6.3.2.13
R02804	MNXR73966	1.7.2.4
R02807	MNXR7463	1.16.1.1
R02814	MNXR35767	3.1.2.14
R02819	MNXR73969	1.1.1.21
R02821	MNXR68436	2.1.1.5
R02832	MNXR7094	1.1.1.206;1.1.1.236
R02853	MNXR4485	3.1.3.3
R02857	MNXR9911	3.8.1.3
R02860	MNXR73978	1.5.99.4
R02864	MNXR69900	4.99.1.4
R02872	MNXR8602	1.3.1.96;2.5.1.21
R02878	MNXR6917	1.1.1.1;1.1.1.73
R02879	MNXR20110	1.14.15.3
R02886	MNXR73982	3.2.1.4;3.2.1.91
R02887	MNXR73983	3.2.1.21
R02889	MNXR73985	2.4.1.12
R02892	MNXR7247	1.3.1.22;1.3.1.4
R02894	MNXR68756	1.4.3.3
R02908	MNXR68224	1.4.3.4
R02914	MNXR70063	4.2.1.49
R02918	MNXR39679	6.1.1.1
R02923	MNXR1435	1.4.3.3
R02925	MNXR73993	1.1.99.21
R02926	MNXR69430	3.2.1.22
R02935	MNXR5296	1.1.1;1.1.1.154
R02936	MNXR6856	1.1.1.154
R02940	MNXR15207	1.2.1.3
R02941	MNXR6969	1.2.1.-;1.2.1.65
R02948	MNXR68258	4.1.1.5
R02961	MNXR19359	2.1.1.72
R02964	MNXR74000	1.6.5
R02978	MNXR132	1.1.1.102
R02985	MNXR74004	3.2.1.117;3.2.1.21
R02987	MNXR74005	1.3.99.8
R02988	MNXR15218	1.3.1.32
R02989	MNXR7242	1.3.1.32
R02990	MNXR184	2.8.3.6
R02991	MNXR4008	3.1.1.24
R03005	MNXR3836	2.7.7.1;2.7.7.18
R03013	MNXR2969	3.1.3.15
R03014	MNXR4631	2.7.1.5
R03015	MNXR74009	1.2.99.5
R03018	MNXR4362	2.7.1.33
R03024	MNXR6332	3.1.3.1;3.1.3.2;3.1.3.41
R03025	MNXR70904	1.12.98.1
R03026	MNXR1863	4.2.1;4.2.1.116;4.2.1.17;4.2.1.55
R03027	MNXR154	4.2.1.55
R03028	MNXR8533	1.3.8.6;4.1.1.70
R03030	MNXR8615	4.3.1.14
R03031	MNXR6253	5.3.3.3
R03032	MNXR7641	4.2.1.5
R03033	MNXR2500	4.2.1.6
R03035	MNXR4514	2.7.7.3
R03037	MNXR74013	3.3.2.1
R03038	MNXR39686	6.1.1.7
R03042	MNXR74015	3.6.1.11
R03045	MNXR4458	4.2.1.116;4.2.1.17
R03054	MNXR7091	1.1.1.195
R03067	MNXR69004	2.5.1.15
R03070	MNXR7435	5.3.3.6
R03071	MNXR15227	1.9.6.1
R03076	MNXR74017	2.7.1.69
R03080	MNXR30684	1.1.1.21;1.1.1.77
R03083	MNXR1594	4.2.3.4;4.6.1.3
R03084	MNXR55233	4.2.1.10
R03088	MNXR5516	1.14.14.1
R03089	MNXR6102	1.14.14.1
R03090	MNXR4021	1.14.14.1
R03093	MNXR69567	3.5.5.1
R03096	MNXR55042	3.5.1.4
R03102	MNXR68238	1.2.1;1.2.1.31
R03103	MNXR70145	1.2.1.31
R03106	MNXR69413	2.8.1.2
R03119	MNXR7174	1.1.1.202
R03120	MNXR61606	2.6.1.57
R03123	MNXR70794	1.1.1.219
R03130	MNXR456	2.1.1.4
R03136	MNXR70748	1.1.2.6
R03139	MNXR17	1.4.3.21;1.4.3.22;1.4.3.6
R03145	MNXR74031	1.2.5.1
R03154	MNXR15260	2.8.3.7
R03161	MNXR2257	2.7.1.52
R03162	MNXR56524	3.2.1.51
R03163	MNXR2192	5.3.1.25;5.3.1.3
R03164	MNXR70843	1.3.7.1
R03165	MNXR5287	4.2.1.75
R03167	MNXR74035	1.11.1.12
R03168	MNXR7738	2.3.1.102
R03177	MNXR2580	1.2.1.54
R03180	MNXR55041	3.5.1.4
R03181	MNXR3379	5.2.1.2
R03182	MNXR1455	6.3.3.3
R03184	MNXR5634	1.1.3.8
R03187	MNXR6117	3.5.2.14
R03192	MNXR55988	1.1.1.158;1.3.1.98
R03193	MNXR55986	6.3.2.8
R03194	MNXR5286	2.1.1.107
R03197	MNXR5288	4.1.1.37
R03199	MNXR3256	5.4.99.7
R03200	MNXR6717	5.4.99.8
R03210	MNXR733	2.3.1.47
R03219	MNXR70971	1.14.11.2
R03220	MNXR1272	1.3.3.3
R03222	MNXR70841	1.3.3.4
R03223	MNXR55960	2.5.1.3
R03231	MNXR700	2.6.1.62
R03232	MNXR74046	2.7.1.69
R03236	MNXR4173	2.7.1.11;2.7.1.144;2.7.1.56
R03243	MNXR31722	2.6.1.9
R03244	MNXR5347	5.-.-.-;5.1.3.1;5.1.3.22
R03245	MNXR69766	2.7.4.2
R03254	MNXR3176	2.5.1.55;4.1.2.16
R03260	MNXR4843	2.5.1.48;4.2.99.9
R03264	MNXR7098	1.1.1.183;1.1.1.216
R03266	MNXR33771	2.6.1.1;2.6.1.23
R03269	MNXR4382	4.1.1.36
R03275	MNXR6765	5.4.3.3
R03276	MNXR6494	5.1.2.3
R03277	MNXR6097	4.1.2.20
R03283	MNXR6959	1.2.1.3;1.2.1.47
R03296	MNXR5442	5.1.1.8
R03299	MNXR15304	1.14.13.3;1.14.14.9
R03303	MNXR56777	1.13.11.15
R03307	MNXR3655	5.5.1.2
R03313	MNXR2454	1.2.1.41
R03315	MNXR8046	2.7.1.83
R03317	MNXR55975	1.1.1.336
R03321	MNXR31472	5.3.1.9
R03336	MNXR68157	1.1.1.222;1.1.1.237
R03346	MNXR3870	3.1.3.5
R03348	MNXR69544	2.4.2.19
R03350	MNXR3175	3.1.3.45
R03351	MNXR69298	2.7.7.38
R03352	MNXR5724	3.1.2.4
R03355	MNXR59478	3.2.1.23
R03361	MNXR71269	2.7.1.67
R03362	MNXR74071	2.7.1.137
R03363	MNXR74072	3.1.3.64
R03372	MNXR6331	3.1.3.26;3.1.3.62
R03387	MNXR33792	2.7.1.58
R03390	MNXR6072	2.3.1.101
R03391	MNXR15326	1.17.1.1
R03392	MNXR15327	1.17.1.1
R03396	MNXR15328	1.1.1.135;1.1.1.187
R03397	MNXR15329	1.1.1.187;1.1.1.281
R03398	MNXR6840	1.1.1.135;1.1.1.187
R03399	MNXR7166	1.1.1.187;1.1.1.281
R03401	MNXR7250	1.3.1.42
R03408	MNXR5502	1.1.1.147;1.14.14.1
R03409	MNXR69191	3.6.1.11;3.6.1.40
R03411	MNXR19362	2.1.1.79
R03423	MNXR70583	3.1.4.16
R03424	MNXR69441	2.1.1.16;2.1.1.71
R03425	MNXR55549	1.4.4.2
R03435	MNXR74077	3.1.4.11
R03443	MNXR571	1.2.1.38
R03444	MNXR3441	4.2.1.-;4.2.1.114
R03448	MNXR6733	3.5.2.12
R03451	MNXR5104	1.14.11.8
R03457	MNXR3090	4.2.1.19
R03458	MNXR745	1.1.1.193
R03459	MNXR1583	3.5.4.26
R03460	MNXR4464	2.5.1.19
R03462	MNXR65426	1.13.11.39
R03464	MNXR5519	3.5.4.27
R03470	MNXR228	4.1.1.44
R03471	MNXR2985	2.7.1.49
R03472	MNXR15334
R03477	MNXR7733	2.1.4.2
R03492	MNXR35853	3.2.1.52
R03493	MNXR7645	4.2.1.57
R03503	MNXR55638	2.7.6.3
R03504	MNXR68701	4.1.2.25
R03508	MNXR3091	4.1.1.48
R03509	MNXR4422	5.3.1.24
R03522	MNXR74084	2.5.1.18
R03527	MNXR59493	3.2.1.21
R03530	MNXR69529	2.7.4.6
R03531	MNXR69562	3.6.1.19
R03532	MNXR74086	1.11.1.16;1.11.1.21;1.11.1.7
R03534	MNXR74088	1.1.99.2
R03537	MNXR36	3.1.4.16
R03538	MNXR34	3.1.4.16
R03540	MNXR3386	3.5.1.107
R03542	MNXR35865	3.5.5.1
R03543	MNXR7517	1.14.12.3
R03546	MNXR71484	4.2.1.104
R03581	MNXR6871	1.1.1.183
R03591	MNXR59500	1.1.1.218
R03592	MNXR59501	1.1.1.218
R03595	MNXR4805	2.7.9.3
R03599	MNXR74107	4.4.1.16
R03618	MNXR35875	3.2.1.22;3.2.1.47
R03629	MNXR21194	1.14.14.1
R03634	MNXR35877	3.2.1.22
R03635	MNXR74116	3.2.1.26
R03643	MNXR15394	1.6.5.2
R03646	MNXR48603	6.1.1.19
R03648	MNXR48605	6.1.1.22
R03650	MNXR55176	6.1.1.16
R03652	MNXR35885	6.1.1.18
R03654	MNXR48608	6.1.1.14
R03655	MNXR48609	6.1.1.21
R03656	MNXR48610	6.1.1.5
R03657	MNXR48611	6.1.1.4
R03658	MNXR69386	6.1.1.6
R03659	MNXR48613	6.1.1.10
R03660	MNXR48614	6.1.1.20
R03661	MNXR39691	6.1.1.15
R03662	MNXR48615	6.1.1.11
R03663	MNXR48616	6.1.1.3
R03664	MNXR48617	6.1.1.2
R03665	MNXR50045	6.1.1.9
R03692	MNXR6320	3.1.1.35
R03696	MNXR5496	4.3.1.2
R03701	MNXR7696	2.1.1.67
R03703	MNXR8504	3.2.1.125
R03707	MNXR7182	1.1.1.4;1.1.1.76
R03719	MNXR4790	2.3.1.154;2.3.1.16;2.3.1.176
R03743	MNXR70671	3.5.2.6
R03748	MNXR74136	1.3.99.4
R03771	MNXR74139	2.3.2.3
R03772	MNXR8351	3.1.1.65
R03774	MNXR8551	3.1.1.65;4.2.1.90
R03776	MNXR11079	1.3.1.38;1.3.1.8
R03777	MNXR68268	1.3.3.6;1.3.8.7;1.3.8.8;1.3.99.-;1.3.99.13;1.3.99.3
R03778	MNXR345	2.3.1.155;2.3.1.16;2.3.1.9
R03791	MNXR6778	5.1.2.2
R03793	MNXR74143	1.1.99.31
R03814	MNXR74151	1.14.19.3
R03815	MNXR2572	1.8.1.4
R03816	MNXR56398	1.6.5.2
R03817	MNXR74152	1.10.9.1
R03818	MNXR74153	1.14.15.1
R03820	MNXR6420	3.2.1.105
R03830	MNXR74156	3.8.1.10;3.8.1.11;3.8.1.2
R03856	MNXR15466	1.3.1.38;1.3.1.8
R03857	MNXR68270	1.3.3.6;1.3.8.7;1.3.8.8;1.3.99.-;1.3.99.13;1.3.99.3
R03858	MNXR347	2.3.1.155;2.3.1.16;2.3.1.9
R03867	MNXR74164	2.3.2.2
R03868	MNXR15471	5.2.1.2;5.2.1.4
R03869	MNXR15472	1.2.1.3
R03871	MNXR15474	1.2.3.1
R03876	MNXR74167	6.3.2.19
R03877	MNXR69482	6.6.1.1
R03884	MNXR8462	2.8.3.12
R03887	MNXR70637	3.5.99.5
R03889	MNXR68349	1.2.1.32
R03893	MNXR10798	3.1.1.45
R03896	MNXR7636	4.2.1.35
R03905	MNXR69165	6.3.5.7
R03909	MNXR74171	3.5.1.4
R03920	MNXR35952	2.7.1.1;2.7.1.4
R03921	MNXR16444	3.2.1.26
R03925	MNXR70641	5.1.99.3
R03929	MNXR35	3.1.4.16
R03932	MNXR9746	6.2.1.33
R03940	MNXR55425	2.1.2.9
R03947	MNXR69898	1.3.1.76;2.1.1.107
R03948	MNXR4115	2.1.1.130
R03959	MNXR3656	5.5.1.1
R03966	MNXR59574	5.3.2.-;5.3.2.6
R03968	MNXR3134	4.2.1.33
R03980	MNXR4941	3.1.6.1;3.1.6.2
R03986	MNXR74186	3.6.1.45
R03989	MNXR15513	1.3.1.38;1.3.1.8
R03990	MNXR68271	1.3.3.6;1.3.8.7;1.3.8.8;1.3.8.9;1.3.99.-;1.3.99.13;1.3.99.3
R03991	MNXR348	2.3.1.155;2.3.1.16;2.3.1.9
R03997	MNXR7507	1.14.13.20
R03998	MNXR74188	1.14.13.40
R03999	MNXR70963	1.14.13.40
R04001	MNXR3133	4.2.1.33
R04014	MNXR36855	3.1.2.14;3.1.2.21
R04019	MNXR74198	3.2.1.22
R04025	MNXR68369	1.4.3.4
R04027	MNXR69543	1.4.3.21;1.4.3.6
R04030	MNXR4944	6.2.1.26
R04031	MNXR4945	4.2.1.113
R04035	MNXR4426	3.6.1.31
R04037	MNXR4424	3.5.4.19
R04049	MNXR1516	1.1.1.125
R04053	MNXR71447	4.1.1.82
R04061	MNXR70973	1.13.11.37
R04065	MNXR3098	1.2.1.3
R04076	MNXR74205	2.7.1.69
R04090	MNXR65464	3.1.2.6
R04095	MNXR68274	1.3.8.4;1.3.8.7;1.3.99.10;1.3.99.3
R04096	MNXR59602	1.3.8.4
R04100	MNXR9719	5.3.3.8
R04103	MNXR5778	3.5.1.11
R04109	MNXR48203	1.2.1.70
R04111	MNXR74212	2.7.1.69
R04121	MNXR74214	1.14.14.1
R04122	MNXR74215	1.14.14.1
R04125	MNXR55550	2.1.2.10
R04133	MNXR7076	4.1.1.68
R04138	MNXR3438	6.4.1.4
R04143	MNXR55736	2.7.1.100
R04144	MNXR69784	6.3.4.13
R04147	MNXR15573	5.1.1.17
R04148	MNXR3837	2.4.2.21
R04150	MNXR3857	4.1.3.36
R04152	MNXR8053	2.6.1.37
R04158	MNXR74224	2.5.1.41
R04159	MNXR74225	2.3.2.2
R04170	MNXR1869	4.2.1.17;4.2.1.74
R04173	MNXR32268	2.6.1.52
R04184	MNXR15589	3.2.1.52
R04188	MNXR30457	2.6.1.22
R04189	MNXR4763	2.6.1.69;3.5.3.23
R04198	MNXR15595	1.3.1.26
R04199	MNXR1556	1.3.1.26
R04203	MNXR2909	1.1.1.178;1.1.1.35
R04204	MNXR1873	4.2.1.17
R04208	MNXR69785	6.3.3.1
R04209	MNXR592	4.1.1.21
R04210	MNXR4160	1.1.1.290
R04212	MNXR36000	6.3.5.6
R04217	MNXR32423	2.6.1.81
R04218	MNXR15602	2.5.1.32
R04224	MNXR32870	4.2.1.17
R04231	MNXR4400	6.3.2.5
R04237	MNXR71011	2.1.1.11
R04241	MNXR36005	6.3.2.17
R04259	MNXR6760	5.5.1.7
R04266	MNXR26473	5.1.3.10
R04277	MNXR22516	3.1.1.57
R04286	MNXR69826	4.2.3.12
R04292	MNXR69833	2.5.1.72
R04294	MNXR7457	1.17.4.1
R04297	MNXR7438	1.97.1.2
R04300	MNXR222	1.4.3.21;1.4.3.4;1.4.3.6;1.4.9.2;1.4.99.4
R04311	MNXR74243	2.5.1.26
R04318	MNXR70220	3.5.2.6
R04319	MNXR7243	1.3.1.34
R04323	MNXR69639	4.1.1.45
R04325	MNXR2551	2.1.2.2
R04333	MNXR10420	2.3.1.72
R04347	MNXR5759	2.1.1.86
R04355	MNXR36022	2.3.1.179;2.3.1.180;2.3.1.41;2.3.1.85;2.3.1.86
R04365	MNXR5036	2.3.1.117
R04371	MNXR2911	4.2.1.114;4.2.1.36
R04376	MNXR69256	1.13.11.16
R04379	MNXR70695	5.3.3.10
R04383	MNXR6566	5.3.1.17
R04385	MNXR48675	6.3.4.14
R04393	MNXR74261	2.7.1.69
R04394	MNXR74262	2.7.1.69
R04404	MNXR70581	3.1.3.36
R04405	MNXR69442	2.1.1.14
R04418	MNXR70757	1.2.1.60
R04420	MNXR3650	5.3.1.23
R04424	MNXR10112	4.2.1.79
R04425	MNXR3548	4.2.1.99
R04426	MNXR3132	1.1.1.85
R04427	MNXR55901	2.1.1.41
R04428	MNXR71008	4.2.1.58;4.2.1.59
R04429	MNXR1843	1.3.1.9;2.3.1.86
R04430	MNXR1844	1.3.1.10
R04432	MNXR59645	1.3.8.7;1.3.99.3
R04437	MNXR74266	1.14.99.29
R04439	MNXR69294	1.1.1.86
R04441	MNXR68691	4.2.1.9
R04448	MNXR2946	2.7.1.50
R04449	MNXR74268	6.2.1.22
R04452	MNXR6275	3.1.1.47
R04457	MNXR69845	2.5.1.78;2.5.1.9
R04463	MNXR55855	6.3.5.3
R04464	MNXR70765	1.5.99.11
R04470	MNXR74271	3.2.1.22
R04475	MNXR32377	2.6.1.17
R04478	MNXR15665	4.2.1.83
R04481	MNXR1605	2.1.1.98
R04496	MNXR19339	2.1.1.100
R04506	MNXR59661	1.2.1.3
R04507	MNXR56047	6.2.1.28;6.2.1.7
R04509	MNXR69768	2.7.4.7
R04520	MNXR71221	2.5.1.42
R04533	MNXR74285	1.1.1.100;2.3.1.85;2.3.1.86
R04534	MNXR68183	1.1.1.100;2.3.1.85;2.3.1.86
R04535	MNXR68167	2.3.1.85;2.3.1.86;4.2.1.58;4.2.1.59;4.2.1.60;4.2.1.61
R04536	MNXR68191	1.1.1.100;2.3.1.85;2.3.1.86
R04537	MNXR68178	2.3.1.85;2.3.1.86;4.2.1.59
R04540	MNXR8196	1.8.98.1
R04543	MNXR68186	1.1.1.100;2.3.1.85;2.3.1.86
R04544	MNXR68172	2.3.1.85;2.3.1.86;4.2.1.59;4.2.1.61
R04549	MNXR5314	3.6.1.54
R04550	MNXR38093	2.3.1.191
R04559	MNXR515	4.3.2.2
R04560	MNXR588	2.1.2.3
R04562	MNXR70567	6.3.4.15
R04566	MNXR68185	1.1.1.100;2.3.1.85;2.3.1.86
R04567	MNXR38095	2.3.1.129
R04568	MNXR68170	2.3.1.85;2.3.1.86;4.2.1.59
R04573	MNXR56012	6.3.2.10
R04586	MNXR59672	3.2.1.52
R04587	MNXR56025	3.5.1.108
R04591	MNXR4425	6.3.2.6
R04606	MNXR55674	2.4.1.182
R04633	MNXR74301	3.2.1.23
R04640	MNXR4439	5.3.1.16
R04657	MNXR5010	2.7.1.130
R04658	MNXR3619	2.4.99.12
R04674	MNXR3522	1.4.3.4
R04692	MNXR6998	2.1.1.115;2.1.1.140
R04705	MNXR6379	2.1.1.120
R04724	MNXR68770	1.3.1.9;2.3.1.86
R04725	MNXR68771	1.3.1.10;1.3.1.39;2.3.1.85;2.3.1.86
R04726	MNXR68194	2.3.1.179;2.3.1.180;2.3.1.41;2.3.1.85;2.3.1.86
R04729	MNXR6554	5.1.99.4
R04733	MNXR74323	2.7.7.59
R04734	MNXR74324	4.2.1.96
R04737	MNXR2906	1.1.1.211;1.1.1.35
R04738	MNXR1871	4.2.1.17;4.2.1.74
R04739	MNXR2905	1.1.1.211;1.1.1.35
R04740	MNXR1870	4.2.1.17;4.2.1.74
R04741	MNXR2904	1.1.1.211;1.1.1.35
R04742	MNXR346	2.3.1.155;2.3.1.16;2.3.1.9
R04743	MNXR2903	1.1.1.211;1.1.1.35
R04744	MNXR1868	4.2.1.17;4.2.1.74
R04745	MNXR2902	1.1.1.211;1.1.1.35
R04746	MNXR1867	4.2.1.17;4.2.1.74
R04747	MNXR344	2.3.1.155;2.3.1.16;2.3.1.9
R04748	MNXR2901	1.1.1.211;1.1.1.35
R04749	MNXR1866	4.2.1.17;4.2.1.74
R04751	MNXR68267	1.3.3.6;1.3.8.1;1.3.8.7;1.3.8.8;1.3.99.-;1.3.99.13;1.3.99.2;1.3.99.3
R04753	MNXR15771	1.3.1.38;1.3.1.8
R04754	MNXR68269	1.3.3.6;1.3.8.7;1.3.8.8;1.3.99.-;1.3.99.13;1.3.99.3
R04779	MNXR39694	2.7.1.11
R04780	MNXR39683	3.1.3.11
R04783	MNXR59713	3.2.1.23
R04787	MNXR74331	1.3.5.5;1.3.99.28;1.3.99.29;1.3.99.30;1.3.99.31
R04798	MNXR74333	1.3.5.6;1.3.99.26;1.3.99.28;1.3.99.30;1.3.99.31
R04800	MNXR74335	1.3.5.6;1.3.99.26;1.3.99.30;1.3.99.31
R04805	MNXR15797	1.1.1.1
R04807	MNXR5555	1.14.13.15
R04809	MNXR5842	4.2.1.107
R04810	MNXR5449	1.1.1.35
R04811	MNXR5419	2.3.1.176
R04812	MNXR63826	1.1.1.35
R04813	MNXR58306	4.2.1.107
R04858	MNXR59724	2.1.1.37
R04864	MNXR74347	2.3.1.40
R04880	MNXR111	1.1.1.1
R04890	MNXR179	1.4.3.4
R04893	MNXR69405	1.4.3.4
R04903	MNXR275	1.2.1.3
R04904	MNXR274	1.2.3.1
R04935	MNXR74363	2.3.2.2
R04949	MNXR15853	3.2.1.21
R04951	MNXR74371	3.4.11.1;3.4.11.2;3.4.11.23;3.4.13.-;3.4.13.3
R04952	MNXR68198	2.3.1.179;2.3.1.180;2.3.1.41;2.3.1.85;2.3.1.86
R04953	MNXR68190	1.1.1.100;2.3.1.85;2.3.1.86
R04954	MNXR68177	2.3.1.85;2.3.1.86;4.2.1.59
R04955	MNXR68780	1.3.1.9;2.3.1.86
R04956	MNXR68781	1.3.1.10;1.3.1.39;2.3.1.85;2.3.1.86
R04957	MNXR68199	2.3.1.179;2.3.1.180;2.3.1.41;2.3.1.85;2.3.1.86
R04958	MNXR68782	1.3.1.9;2.3.1.86
R04959	MNXR68783	1.3.1.10;1.3.1.39;2.3.1.85;2.3.1.86
R04960	MNXR68192	2.3.1.179;2.3.1.180;2.3.1.41;2.3.1.85;2.3.1.86
R04961	MNXR68768	1.3.1.9;2.3.1.86
R04962	MNXR68769	1.3.1.10;2.3.1.85
R04963	MNXR68193	2.3.1.179;2.3.1.180;2.3.1.41;2.3.1.85;2.3.1.86
R04964	MNXR68184	1.1.1.100;2.3.1.85;2.3.1.86
R04965	MNXR68168	2.3.1.85;2.3.1.86;4.2.1.59
R04966	MNXR68773	1.3.1.9;2.3.1.86
R04967	MNXR68774	1.3.1.10;2.3.1.85
R04968	MNXR68195	2.3.1.179;2.3.1.180;2.3.1.41;2.3.1.85;2.3.1.86
R04969	MNXR74372	1.3.1.9;2.3.1.86
R04970	MNXR74373	1.3.1.10;1.3.1.39;2.3.1.85;2.3.1.86
R04988	MNXR3953	2.1.1.222;2.1.1.64
R04998	MNXR942	3.2.1.21
R05000	MNXR74383	2.5.1.-;2.5.1.39
R05002	MNXR69050	2.4.1.132
R05049	MNXR4831	1.2.1.71
R05050	MNXR3689	1.2.1.3
R05052	MNXR74389	2.6.1.1;2.6.1.23
R05062	MNXR15891	1.1.2.8;1.1.99.8
R05066	MNXR70156	1.1.1.31;1.1.1.35
R05074	MNXR3620	2.4.99.13
R05076	MNXR59771
R05092	MNXR8013	4.2.3.19
R05099	MNXR6968	1.2.1.4;1.2.1.63
R05102	MNXR15907	1.6.2.4
R05112	MNXR36150	3.2.1.23
R05132	MNXR74413	2.7.1.69
R05135	MNXR37	3.1.4.16
R05136	MNXR9060	4.1.2.45
R05149	MNXR4117	2.1.1.132
R05150	MNXR4116	1.3.1.54
R05176	MNXR74422	5.1.3.20
R05177	MNXR4118	5.4.1.2
R05180	MNXR36765	2.1.1.131
R05181	MNXR4113	2.1.1.133
R05185	MNXR70986	1.18.6.1
R05196	MNXR74429	2.4.1.25
R05198	MNXR74431	1.1.2.8
R05199	MNXR74432	2.7.1.69
R05217	MNXR37261	1.14.13.83
R05218	MNXR71302	1.16.8.1
R05219	MNXR4564	2.1.1.152
R05220	MNXR68611	2.5.1.17
R05221	MNXR495	2.7.1.156
R05222	MNXR356	2.7.7.62
R05223	MNXR496	2.7.8.26
R05224	MNXR34129	6.3.5.9
R05225	MNXR68282	6.3.5.10
R05227	MNXR68556	6.6.1.2
R05231	MNXR15970	1.1.1.2
R05233	MNXR15972	1.1.1.1
R05234	MNXR15973	1.1.1.1
R05236	MNXR70758	1.2.1.61
R05239	MNXR6723	1.3.1.56
R05240	MNXR6724	1.3.1.58
R05263	MNXR6788	1.14.12.18
R05274	MNXR5340	1.14.13.82
R05283	MNXR6718	1.1.1.258
R05284	MNXR9958	3.8.1.5
R05285	MNXR74445	1.1.2.8
R05286	MNXR16009	1.2.1;1.2.1.3
R05287	MNXR9912	3.8.1.10;3.8.1.2;3.8.1.3;3.8.1.9
R05311	MNXR6981	1.3.1.62
R05320	MNXR69939	1.14.11.17
R05329	MNXR19533	2.5.1.46
R05332	MNXR2417	2.3.1.157;2.3.1.4
R05334	MNXR74454	1.4.3.21;1.4.3.22
R05338	MNXR5933	4.1.2.-;4.1.2.43
R05339	MNXR71533	5.3.1.27
R05357	MNXR8172	3.5.3.22
R05367	MNXR16045	3.8.1.5
R05368	MNXR16046	3.8.1.5
R05380	MNXR8794	4.2.1.112
R05389	MNXR68216	5.3.2.-
R05399	MNXR70767	1.6.5.7
R05506	MNXR59866	2.3.1.-;2.3.1.16
R05549	MNXR74506	3.2.1.22
R05551	MNXR55043	3.5.1.4;3.5.1.49
R05553	MNXR467	4.1.3.38
R05554	MNXR59879	3.5.3;3.5.3.-
R05558	MNXR899	3.8.1.8
R05559	MNXR6544	3.5.99.3
R05563	MNXR7074	3.5.1.84
R05570	MNXR74508	2.7.1.69
R05577	MNXR68419	6.1.1.12;6.1.1.23
R05578	MNXR48752	6.1.1.17;6.1.1.24
R05581	MNXR59882	1.1.1;1.1.1.-
R05584	MNXR59885	1.3.8.3;1.3.99.21
R05590	MNXR9831	3.5.1.13;3.5.1.4;3.5.5.1
R05591	MNXR9872	3.5.5.1;3.5.5.5;3.5.5.7
R05597	MNXR6780	4.2.1.100
R05604	MNXR6821	1.1.1.11
R05605	MNXR1488	4.1.2.-;4.1.2.14
R05606	MNXR3617	4.2.1.8
R05607	MNXR36195	1.1.1.140
R05608	MNXR2498	4.2.1.42
R05614	MNXR59897	2.1.1.64
R05621	MNXR986	1.14.12.10
R05624	MNXR36197	3.2.1.65
R05627	MNXR56541	3.6.1.27
R05629	MNXR59903	2.7.8.13
R05633	MNXR69431	2.7.7.60
R05634	MNXR1102	2.7.1.148
R05636	MNXR1819	2.2.1.7
R05637	MNXR3474	4.6.1.12
R05639	MNXR1000	1.3.1.70
R05641	MNXR1022	1.3.1.71
R05644	MNXR74523	2.7.7.70
R05645	MNXR4759	5.3.1.28
R05646	MNXR2785	2.7.1.167
R05647	MNXR2786	3.1.3.82
R05651	MNXR71184	2.3.3.15
R05652	MNXR8246	2.6.1.77
R05661	MNXR8291	2.7.1.92
R05662	MNXR55984	2.4.1.227
R05679	MNXR6919	1.1.1.261;1.1.1.8;1.1.1.94
R05680	MNXR6922	1.1.1.261;1.1.1.94
R05681	MNXR56517	1.1.1.262
R05683	MNXR21918	1.1.1.264;1.1.1.n8
R05684	MNXR6719	1.1.1.128;1.1.1.264
R05688	MNXR1818	1.1.1.267
R05689	MNXR7178	1.1.1.268
R05690	MNXR7179	1.1.1.269
R05692	MNXR69128	1.1.1.271
R05699	MNXR5336	1.2.1.67
R05700	MNXR1227	1.2.1.68
R05701	MNXR6970	1.2.1.68
R05704	MNXR73646	1.4.99.5
R05706	MNXR68997	1.5.1.-;1.5.1.29;1.5.1.38;1.5.1.39
R05707	MNXR68998	1.5.1.30;1.5.1.41
R05712	MNXR70768	1.7.2.2
R05721	MNXR6785	1.13.11.49
R05722	MNXR4258	1.14.11.18
R05731	MNXR6796	1.14.13.70
R05735	MNXR7128	6.4.1.6
R05747	MNXR16278	1.20.4.1
R05752	MNXR74539	1.20.99.1
R05771	MNXR7344	4.2.1.103
R05772	MNXR6694	4.2.1.101
R05773	MNXR6779	4.1.2.41
R05774	MNXR4878	4.1.1.79
R05775	MNXR74543	3.13.1.1
R05780	MNXR33128	3.5.5.8
R05789	MNXR4481	3.1.3.71
R05794	MNXR74544	2.7.8.24
R05797	MNXR6581	3.1.1.75
R05802	MNXR74546	2.7.1.150
R05808	MNXR59918	2.1.1.151
R05812	MNXR68571	1.3.1.54
R05814	MNXR68572	5.4.1.2
R05815	MNXR71673	6.3.5.11
R05820	MNXR74550	2.7.1.69
R05823	MNXR1609	1.1.1.274
R05835	MNXR5927	3.5.1.24
R05837	MNXR16307	1.1.1.262
R05838	MNXR8716	2.6.99.2
R05850	MNXR4588	5.1.3.4
R05861	MNXR1423	1.4.3.19;1.4.3.3
R05875	MNXR70934	1.18.1.3
R05884	MNXR57060	1.17.1.2
R05916	MNXR74584	2.4.1.198
R05961	MNXR35875	3.2.1.22;3.2.1.47
R05963	MNXR15589	3.2.1.52
R05973	MNXR69050	2.4.1.132
R05980	MNXR16404	3.2.1.84
R05981	MNXR16405	3.2.1.84
R05982	MNXR16406	3.2.1.113
R05994	MNXR36150	3.2.1.23
R06001	MNXR35853	3.2.1.52
R06004	MNXR59672	3.2.1.52
R06010	MNXR74301	3.2.1.23
R06023	MNXR73985	2.4.1.12
R06028	MNXR73898	2.4.1.16
R06034	MNXR71199	2.4.1.7
R06040	MNXR14845	2.4.1.8
R06043	MNXR69996	2.4.1.15
R06049	MNXR73909	2.4.1.21
R06050	MNXR73807	2.4.1.1
R06051	MNXR73631	2.4.1.11
R06052	MNXR73808	2.4.1.4
R06053	MNXR7969	2.4.1.64
R06069	MNXR74429	2.4.1.25
R06070	MNXR32322	3.2.1.22
R06073	MNXR73688	2.4.1.14
R06077	MNXR73983	3.2.1.21
R06081	MNXR73732	3.2.1.14
R06082	MNXR73897	3.2.1.14
R06084	MNXR14508	3.2.1.20
R06087	MNXR69924	3.2.1.10;3.2.1.20;3.2.1.26;3.2.1.48
R06088	MNXR11052	3.2.1.20;3.2.1.21;3.2.1.26;3.2.1.48
R06091	MNXR31035	3.2.1.22
R06092	MNXR10073	3.2.1.108;3.2.1.21;3.2.1.74
R06093	MNXR31508	3.2.1.22
R06094	MNXR74198	3.2.1.22
R06096	MNXR74506	3.2.1.22
R06098	MNXR35625	3.2.1.108;3.2.1.23
R06099	MNXR59478	3.2.1.23
R06100	MNXR69841	3.2.1.26
R06101	MNXR74116	3.2.1.26
R06102	MNXR16444	3.2.1.26
R06103	MNXR5123	3.2.1.28
R06104	MNXR14486	3.1.1.20;3.2.1.149;3.2.1.21;3.2.1.28;3.2.1.58;3.2.1.6;3.2.1.74;3.7.1.4
R06112	MNXR70612	3.2.1.86
R06113	MNXR69995	3.2.1.122;3.2.1.93
R06114	MNXR31780	3.2.1.108;3.2.1.23
R06117	MNXR8191	1.1.1.275
R06127	MNXR60020	2.4.1.131
R06128	MNXR74638	2.4.1.131
R06141	MNXR5635	3.2.1.52
R06142	MNXR68809	3.2.1.22
R06144	MNXR59713	3.2.1.23
R06152	MNXR35877	3.2.1.22
R06154	MNXR3434	1.4.3.21;1.4.3.6
R06158	MNXR73847	3.2.1.33
R06173	MNXR55984	2.4.1.227
R06178	MNXR60036	2.4.1.129
R06179	MNXR60036	2.4.1.129
R06180	MNXR16467	1.1.1.93
R06186	MNXR73848	2.4.1.18
R06199	MNXR73802	3.2.1.10;3.2.1.3
R06200	MNXR74657	3.2.1.4;3.2.1.91
R06201	MNXR73823	3.2.1.15;3.2.1.67
R06202	MNXR73725	3.2.1.23
R06203	MNXR73772	3.2.1.37
R06205	MNXR73800	3.2.1.55
R06206	MNXR36197	3.2.1.65
R06207	MNXR16479	3.2.1.25
R06208	MNXR73706	3.2.1.80
R06209	MNXR73846	3.2.1.1
R06212	MNXR71271	2.7.1.69
R06218	MNXR3648	5.4.99.16;5.4.99.6
R06223	MNXR55919	2.5.1.21
R06225	MNXR59301	3.2.1.165
R06226	MNXR73952	2.4.1.15
R06228	MNXR5121	3.1.3.12
R06229	MNXR73959	2.7.1.69
R06233	MNXR73696	1.1.99.13
R06236	MNXR74212	2.7.1.69
R06237	MNXR74261	2.7.1.69
R06238	MNXR74663	2.4.1.257
R06239	MNXR73899	3.2.1.15;3.2.1.82
R06241	MNXR74665	3.5.1.41
R06243	MNXR73809	5.4.99.15
R06265	MNXR72113	1.14.13.81
R06266	MNXR71165	1.14.13.81
R06267	MNXR74679	1.14.13.81
R06275	MNXR73779	2.4.1.80
R06282	MNXR71645	1.3.7.7
R06285	MNXR3620	2.4.99.13
R06363	MNXR60099	3.5.2.6
R06366	MNXR4546	1.2.1.3
R06398	MNXR26611	1.14.13.107
R06419	MNXR8876	1.3.1.81
R06420	MNXR8877	1.3.1.81
R06447	MNXR55990	2.5.1.31
R06513	MNXR5009	4.2.1.46
R06514	MNXR74752	5.1.3.13
R06529	MNXR469	6.3.1.10
R06530	MNXR5061	4.1.1.81
R06558	MNXR72187	2.7.1.156
R06601	MNXR8375	3.5.2.17
R06604	MNXR74781	4.1.1.-;4.1.1.n1
R06613	MNXR16754	2.1.1.148
R06620	MNXR74788	1.1.5.2
R06722	MNXR16845	3.2.1.113
R06734	MNXR7102	1.1.1.236
R06740	MNXR74852	1.4.3.21
R06782	MNXR4410	1.14.12.19
R06784	MNXR1582	1.3.1.87
R06785	MNXR1546	1.3.1.87
R06786	MNXR162	1.14.13.127
R06787	MNXR156	1.14.13.127
R06788	MNXR68693	1.13.11.16
R06789	MNXR69240	3.7.1.-
R06836	MNXR69836	2.7.4.23
R06895	MNXR1273	1.3.99.22
R06917	MNXR16994	1.1.1.1
R06927	MNXR12173	1.1.1.1;1.1.1.90
R06941	MNXR60328	1.1.1.157;1.1.1.35
R06946	MNXR17022	1.14.13.90
R06947	MNXR17023	1.14.13.90
R06954	MNXR8663	1.1.1.288
R06975	MNXR589	6.3.4.-
R06977	MNXR30981	2.6.1.-;2.6.1.76
R06978	MNXR17043	2.3.1.178
R06979	MNXR11716	4.2.1.108
R06982	MNXR2064	4.4.1.22
R06983	MNXR2062	1;1.1.1.284
R06985	MNXR11078	1.3.1.38;1.3.1.8
R06989	MNXR74941	5.5.1.1
R06990	MNXR70638	5.3.3.4
R07093	MNXR74992	2.5.1.18
R07094	MNXR74993	2.5.1.18
R07100	MNXR74995	2.5.1.18
R07113	MNXR74998	2.5.1.18
R07116	MNXR75001	2.5.1.18
R07133	MNXR69885	1.1.1.140
R07135	MNXR17174	1.1.1.255
R07136	MNXR4857	1.1.1.272;1.1.1.337
R07140	MNXR8605	1.1.1.284
R07143	MNXR8680	1.1.1.287
R07144	MNXR8681	1.1.1.287
R07145	MNXR70731	1.1.1.14
R07148	MNXR20269	1.1.1.122
R07158	MNXR75013	1.2.7.5
R07160	MNXR71319	1.2.7.7
R07162	MNXR47439	1.3.1.37;1.3.1.38;1.3.1.8
R07164	MNXR10769	1.4.1.21
R07165	MNXR8594	1.4.1.21
R07166	MNXR75015	1.4.99.1
R07167	MNXR75016	1.4.99.2
R07168	MNXR3644	1.5.1.20
R07170	MNXR7305	1.5.3.6
R07182	MNXR75019	1.12.99.6
R07188	MNXR11564	1.14.12.10
R07199	MNXR8677	1.14.13.90
R07200	MNXR8678	1.14.13.90
R07210	MNXR75021	1.14.14.5
R07211	MNXR4244	1.14.16.1
R07212	MNXR5169	1.14.16.2
R07213	MNXR5137	1.14.16.4
R07214	MNXR71236	1.14.17.4
R07219	MNXR71767	1.17.1.2
R07223	MNXR75023	1.17.99.1
R07226	MNXR8038	1.21.4.2
R07235	MNXR60376	2.1.1.64
R07236	MNXR6233	2.1.1.95
R07237	MNXR5475	2.1.1.107
R07238	MNXR6043	2.1.1.107
R07245	MNXR8742	2.1.3.9
R07265	MNXR33869	2.4.1.231
R07267	MNXR75035	2.5.1.84;2.5.1.85
R07268	MNXR68472	2.5.1.17
R07273	MNXR72678	2.5.1.39
R07276	MNXR33976	2.6.1.79
R07281	MNXR26412	4.1.99.12
R07282	MNXR17217	2.7.7.8
R07291	MNXR70542	3.1.1.4;3.1.1.5
R07297	MNXR75040	3.1.3.31;3.1.3.5
R07302	MNXR468	6.3.1.10
R07305	MNXR6734	3.5.2.15
R07316	MNXR8788	3.5.1.110;4.2.1.104
R07322	MNXR7569	5.4.99.17
R07323	MNXR7570	4.2.1.129;5.4.99.17
R07324	MNXR75043	5.5.1.4
R07325	MNXR75044	6.2.1.20
R07328	MNXR14636	1.1.1.2;1.1.1.71
R07343	MNXR17240	3.1.3.25
R07354	MNXR17248	1.5.1.34
R07358	MNXR28278	1.6.5.2
R07362	MNXR8704	1.13.11.52
R07363	MNXR71450	1.13.11.53
R07364	MNXR57228	1.13.11.54
R07392	MNXR3469	4.2.1.109
R07393	MNXR71472	3.1.3.77;5.3.2.-;5.3.2.5
R07394	MNXR71473	3.1.3.77;3.1.3.87
R07395	MNXR71471	3.1.3.77
R07399	MNXR8806	2.3.1.182
R07400	MNXR10221	1.4.3.3
R07404	MNXR590	6.3.4.18
R07405	MNXR591	5.4.99.18
R07406	MNXR60406	1.1.1.262
R07408	MNXR8758	1.4.3.10;1.5.99.6;2.6.1.82
R07414	MNXR33952	6.3.1.11
R07419	MNXR31549	3.5.1.94
R07429	MNXR75072	1.3.1;1.3.99.-
R07447	MNXR17302	1.3.1;1.3.99.-
R07459	MNXR17314	2.7.7.73
R07460	MNXR48815	2.8.1.7
R07463	MNXR17317	1.4.3.19
R07476	MNXR71232	4.4.1.19
R07477	MNXR17329	2.5.1.46
R07478	MNXR75092	2.5.1.46
R07479	MNXR75093	2.5.1.46
R07480	MNXR75094	2.5.1.46
R07504	MNXR10355	2.1.1.95
R07511	MNXR71708	1.3.5.6
R07605	MNXR8748	1.7.1.13
R07608	MNXR3501	1.8.4.12;1.8.4.14
R07613	MNXR33992	2.6.1.83
R07618	MNXR75123	1.8.1.4
R07627	MNXR8726	3.3.2.9
R07634	MNXR71463	4.4.1.25
R07641	MNXR1067	6.3.4.16;6.3.5.5
R07650	MNXR8729	4.1.1.86
R07651	MNXR612	3.4.13.22;3.4.17.14
R07658	MNXR5228	1.1.1.305
R07659	MNXR32552	2.6.1.87
R07660	MNXR5267	2.1.2.13
R07661	MNXR57352	2.4.2.-;2.7.8.30;2.7.8.B2
R07664	MNXR75133	1.1.99.31
R07669	MNXR12293	3.8.1.5
R07670	MNXR12865	3.8.1.5
R07671	MNXR75135	2.7.1.69
R07675	MNXR26808	1.1.1.122;1.1.1.316;1.1.1.B25
R07761	MNXR60505	1.3.1;1.3.1.38
R07762	MNXR75172	2.3.1.179;2.3.1.199;2.3.1.41;2.3.1.86
R07763	MNXR68187	1.1.1.100
R07765	MNXR23934	1.3.1.9;1.3.1.93
R07766	MNXR75173	2.3.1.181
R07767	MNXR75174	2.8.1.8
R07770	MNXR8719	2.7.7.63
R07771	MNXR75177	2.7.7.63
R07773	MNXR71638	2.1.1.195
R07807	MNXR36464	3.2.1.23
R07809	MNXR17571	3.2.1.52
R07810	MNXR17572	3.2.1.52
R07816	MNXR17578	3.2.1.50
R07818	MNXR75194	3.2.1.31
R07823	MNXR17585	3.1.6.12
R07832	MNXR60527	2.8.3;2.8.3.8
R07855	MNXR17615	3.5.5.1
R07889	MNXR17648	4.2.1.17;4.2.1.74
R07890	MNXR17649	1.1.1.211;1.1.1.35
R07891	MNXR17650	2.3.1.16
R07893	MNXR17652	4.2.1.17;4.2.1.74
R07894	MNXR17653	1.1.1.211;1.1.1.35
R07895	MNXR17654	2.3.1.16
R07897	MNXR17656	4.2.1.17;4.2.1.74
R07898	MNXR17657	1.1.1.211;1.1.1.35
R07899	MNXR17658	2.3.1.16
R07936	MNXR75254	1.1.1.211
R07937	MNXR60579	2.3.1.16;2.8.3.8
R07946	MNXR75255	1.5.99.4
R07952	MNXR75260	1.1.1.211
R07953	MNXR75261	2.3.1.16
R07984	MNXR8773	3.5.2.18
R08057	MNXR8828	2.7.7.65
R08091	MNXR60653	2.3.1;2.3.1.16
R08095	MNXR17834	2.3.1;2.3.1.16
R08165	MNXR57284	2.2.1.9
R08193	MNXR377	5.4.2.3
R08198	MNXR17919	1.1.1;1.1.1.95
R08209	MNXR55660	1.17.1.2
R08210	MNXR68731	1.17.1.2
R08219	MNXR55909	2.9.1.1
R08236	MNXR7696	2.1.1.67
R08239	MNXR75333	2.1.1.67
R08246	MNXR75340	2.1.1.67
R08260	MNXR75348	3.2.1.31
R08281	MNXR17974	1.1.1.1
R08306	MNXR17999	1.1.1.1
R08348	MNXR75396	1.4.3.4
R08349	MNXR75397	1.2.3.1
R08366	MNXR75409	2.7.1.69
R08367	MNXR75410	2.7.1.69
R08368	MNXR7993	2.4.2.1
R08384	MNXR71954	1.2.3.11
R08468	MNXR75465	2.1.1.98
R08469	MNXR75466	2.1.1.98
R08503	MNXR18179	5.3.1.-;5.3.1.n1
R08528	MNXR71486	2.5.1.68
R08539	MNXR18208	1.6.2.4
R08550	MNXR7352	1.8.1.4
R08551	MNXR60851	1.6.2.4
R08553	MNXR75486	1.8.99.2
R08555	MNXR68260	4.2.1.126
R08557	MNXR1151	1.1.1;1.1.1.1;1.1.99.1
R08558	MNXR18214	1.1.1;1.1.1.1
R08559	MNXR75487	2.7.1.69
R08568	MNXR18223	2.2.1.10
R08571	MNXR75494	1.2.7.5
R08572	MNXR2757	2.7.1.165;2.7.1.31
R08574	MNXR71516	2.7.1.161
R08575	MNXR4978	2.2.1.2
R08588	MNXR18233	1.21.-.-
R08603	MNXR75503	3.7.1.-;3.7.1.n2
R08613	MNXR60866	3.2.1.25
R08614	MNXR18256	3.2.1.25
R08632	MNXR60868	4.4.1.1
R08635	MNXR60870	4.4.1.11
R08637	MNXR57475	4.4.1.1;4.4.1.11;4.4.1.2
R08639	MNXR69672	5.4.2.2;5.4.2.5
R08657	MNXR75507	1.1.5.3
R08689	MNXR71238	1.17.7.1
R08715	MNXR75529	3.2.1.165
R08717	MNXR18339	3.2.1.24
R08718	MNXR18340	3.2.1.24
R08734	MNXR60899	5.1.99.4
R08739	MNXR18350	5.1.99.4
R08764	MNXR285	1.14.13.114
R08769	MNXR18371	2.1.1.222
R08781	MNXR75549	2.1.1.114;2.1.1.64
R08860	MNXR75579	2.7.1.69
R08926	MNXR72030	1.1.1.122
R08938	MNXR8812	2.3.1.183
R08944	MNXR18517	2.3.1.187
R08946	MNXR8749	2.4.1.245
R08954	MNXR18521	1.3.1.30
R09053	MNXR75603
R09078	MNXR9073	1.1.1.304
R09083	MNXR18583	1.14.99.40
R09087	MNXR8311	2.7.4.21
R09095	MNXR75621	1.12.2.-;1.12.98.3
R09097	MNXR3606	1.2.1
R09125	MNXR4551	1.13.11.9
R09126	MNXR3811	3.5.1.106
R09186	MNXR18668	4.2.1.-
R09245	MNXR57406	2.5.1.83
R09246	MNXR57405	2.5.1.82
R09247	MNXR57009	2.5.1.30
R09248	MNXR55805	2.5.1.90
R09250	MNXR71615	2.5.1.84
R09280	MNXR8995	1.2.1.76
R09289	MNXR8993	1.1.1.-;1.1.1.298
R09291	MNXR9230	1.3.1.85
R09322	MNXR6942	1.1.5.8
R09323	MNXR18786	3.2.1.52
R09382	MNXR75681	2.7.7.72
R09383	MNXR75682	2.7.7.72
R09384	MNXR18839	2.7.7.72
R09385	MNXR18840	1.14.13.107
R09386	MNXR18841	2.7.7.72
R09389	MNXR18842	1.14.13.107
R09393	MNXR8931	1.14.13.107
R09394	MNXR75683	4.1.99.18
R09395	MNXR75684
R09396	MNXR71588	2.5.1.77
R09397	MNXR3325	2.7.7.68
R09398	MNXR3262	2.7.8.28
R09399	MNXR69120	6.3.2.31
R09400	MNXR71589	6.3.2.34
R09473	MNXR61160	1.17.2.1
R09489	MNXR75703	1.3.5.3
R09492	MNXR75704	1.10.3.12
R09494	MNXR75706	1.1.5.6
R09513	MNXR71544	1.14.13.111
R09517	MNXR71632	1.14.14.8
R09530	MNXR71565	2.5.1.76
R09536	MNXR8991	3.5.1.99
R09537	MNXR8990	3.5.1.99
R09543	MNXR75718	2.1.1.197
R09551	MNXR75719	1.1.99.32
R09554	MNXR9028	1.2.1.77
R09555	MNXR9020	1.14.12.21
R09556	MNXR9059	4.1.2.44
R09563	MNXR9008	1.11.1.17
R09567	MNXR9009	1.13.12.17
R09591	MNXR1168	6.3.1.13
R09598	MNXR71678	6.3.5.11
R09599	MNXR71679	6.3.5.11
R09600	MNXR18951	5.1.3.23
R09622	MNXR3634	2.3.1.189
R09634	MNXR61204	2.4.1.250
R09651	MNXR3089	3.5.1.103
R09656	MNXR75730	1.3.5.6
R09658	MNXR75731	1.3.5.6
R09659	MNXR75732	1.3.99.26
R09676	MNXR62496	2.4.1.255
R09677	MNXR62497	2.4.1.255
R09691	MNXR75736	1.3.99.28
R09692	MNXR75737	1.3.99.28;1.3.99.29;1.3.99.30;1.3.99.31
R09693	MNXR75738	1.3.99.29
R09698	MNXR26637	4.2.1.119
R09716	MNXR75740	1.3.99.31
R09720	MNXR8932	4.2.1.114
R09725	MNXR21513	3.1.1.85
R09726	MNXR71664	2.7.7.75
R09730	MNXR71619	2.5.1.89
R09736	MNXR36668	2.1.1.163
R09737	MNXR24605	2.1.1.201
R09750	MNXR68999	1.5.1.30;1.5.1.41
R09763	MNXR19000	2.4.99.14
R09764	MNXR19000	2.4.99.14
R09765	MNXR9046	2.4.99.15
R09766	MNXR19001	2.4.99.15
R09767	MNXR9049	2.7.1.166
R09768	MNXR19002	5.3.1.28
R09769	MNXR19003	5.3.1.28
R09770	MNXR9090	2.7.1.168
R09771	MNXR9056	3.1.3.83
R09772	MNXR9052	2.7.7.71
R09780	MNXR36673	5.3.1.27
R09819	MNXR75761	1.14.14.12
R09820	MNXR61234	1.17.1.7
[truncated: 84 more rows]
